# Supplementary material for: Merging of the photocatalyst decatungstate and naphthalene diimide in a hybrid structure for the oxidative coupling of amines
Source: Royal Society of Chemistry journal article supplement (doi:10.1039/d2dt01003h), 2022-01-01
Supplement: d2dt01003h1.pdf [file d2dt01003h1.pdf]

## Supporting Information

### **Merging of the photocatalyst decatungstate and naphthalene diimide in hybrid structure for oxidative coupling of amines**

Zhengfen Liu, Xiaobo Li, Jian Chen, Chao Li, Fumang Luo, Feixiang Cheng\* and Jian-Jun Liu\*

College of Chemistry and Environmental Science, Qujing Normal University, Qujing 655011, China. E-mail: chengfx2019@163.com (F.-X Cheng); jjliu302@163.com (J.-J. Liu)

## Supplementary Methods:

### General methods

All air- and moisture-sensitive solutions and chemicals were handled under a argon atmosphere. Anhydrous solvents were purchased from Sigma-Aldrich and used without further purification. Unless otherwise stated, all reagents were commercially available and used as received without further purification. TLC was performed with Merck TLC Silica gel60 F<sub>254</sub> plates with detection under UV light at 254 nm. Silica gel (200-300 mesh, Qingdao) was used for flash chromatography. Deactivated silica gel was prepared by addition of 15 mL Et<sub>3</sub>N to 1 L of silica gel. Elemental analysis of the compound was recorded on Elementar Vario EL cube elemental analyzer. Powder X-ray diffraction (PXRD) intensities were performed at room temperature on a Bruker D8 ADVANCE X-Ray diffractometer at 40 kV, 50 mA for a Cu-target tube and a graphite monochromator. A Mettler Toledo equipment in the range 30-800°C with a ramp rate of 10 °C/min was used to carry out thermogravimetric analysis (TGA) experiment in nitrogen atmosphere. Fourier infrared (IR) spectra were measured on a NICOLET 5700 spectrometer using KBr disks dispersed with sample powders. Nuclear magnetic resonance (NMR) spectrum was measured on a Bruker Avance III 400 NMR spectrometer. UV-vis spectra were performed on a Varian Cary 500 UV–Vis spectrophotometer. The XPS experiments were carried out using Thermo Fisher ESCALAB250 spectrometer with Al<sub>Kα</sub> X-ray source ( $\lambda = 8.357 \text{ \AA}$ ).

### Procedure and characterization for oxidative coupling of amines

#### General Procedure:

An oven-dried 10 mL reaction tube equipped with a stir bar was charged with amines (0.4 mmol) and compound 1 (3.42 mg, 0.002 mmol, 0.5 mol%) in air. Anhydrous DMF (2.0 mL) was added by a “Titan” brand 1000  $\mu\text{L}$  pipettor to the reaction tube. The mixture was exposed to a 100 W white LED lamp placed at a distance of 10 cm and stirred for 24 hours at room temperature. Reaction progress was monitored by TLC. The mixture was extracted with ethyl acetate (10 mL  $\times$  3). The combined organic layer was washed with brine, dried over Na<sub>2</sub>SO<sub>4</sub>, and the combined solutions were concentrated under reduced pressure. Assay yield determined by <sup>1</sup>H NMR spectroscopy of the crude reaction mixtures using C<sub>2</sub>H<sub>2</sub>Cl<sub>4</sub> as an internal standard. The crude product was purified by flash chromatography with loading it onto a deactivated silica gel column. (deactivated silica gel was

prepared by the addition of 15 mL of Et<sub>3</sub>N to 1 L of silicagel).

**Product Characterization:**

**(*E*)-*N*-benzyl-1-phenylmethanimine (**2a**):**

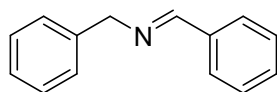

The reaction was performed following the General Procedure with phenylmethanamine **1a** (42.86 mg, 0.4 mmol). The crude material was purified by flash chromatography on deactivated silica gel (eluted with EtOAc : hexanes = 1:25) to give the product **2a** (37.88 mg, 97% yield) as a colorless oil.

<sup>1</sup>H NMR (400 MHz, Chloroform-*d*) δ 8.41 (t, *J* = 1.6 Hz, 1H), 7.81 – 7.78(m, 2H), 7.45 – 7.41(m, 3H), 7.36 (d, *J* = 4.4 Hz, 4H), 7.29 (dd, *J* = 4.8, 3.6 Hz, 1H), 4.84 (d, *J* = 1.6 Hz, 2H) ppm; <sup>13</sup>C{<sup>1</sup>H} NMR (100 MHz, Chloroform-*d*) δ 162.1, 139.3, 136.1, 130.8, 128.6, 128.5, 128.3, 128.0, 127.0, 65.1 ppm.

**(*E*)-*N*-(2-methoxybenzyl)-1-(2-methoxyphenyl)methanimine (**2b**):**

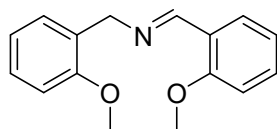

The reaction was performed following the General Procedure with (2-methoxyphenyl)methanamine **1b** (54.88 mg, 0.4 mmol). The crude material was purified by flash chromatography on deactivated silica gel (eluted with EtOAc : hexanes = 1:25) to give the product **2b** (50.04 mg, 98% yield) as a colorless oil.

<sup>1</sup>H NMR (400 MHz, Chloroform-*d*) δ 8.84 (d, *J* = 1.2 Hz, 1H), 8.03 (dt, *J* = 7.6, 1.6 Hz, 1H), 7.37 (ddd, *J* = 8.4, 7.2, 1.6 Hz, 1H), 7.30 (ddd, *J* = 7.6, 2.0, 1.2 Hz, 1H), 7.25 – 7.21 (m, 1H), 6.99 – 6.85 (m, 4H), 4.83 (s, 2H), 3.85 (s, 3H), 3.83 (s, 3H) ppm; <sup>13</sup>C{<sup>1</sup>H} NMR (100 MHz, Chloroform-*d*) δ 158.8, 158.4, 157.1, 131.9, 129.1, 128.1, 128.0, 127.5, 124.8, 120.8, 120.5, 111.0, 110.2, 59.7, 55.5, 55.4 ppm.

**(*E*)-*N*-(3-methoxybenzyl)-1-(3-methoxyphenyl)methanimine (**2c**):**

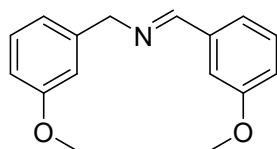

The reaction was performed following the General Procedure with (3-methoxyphenyl)methanamine **1c** (54.88 mg, 0.4 mmol). The crude material was purified by flash chromatography on deactivated silica gel (eluted with EtOAc : hexanes = 1:25) to give the product **2c** (45.96 mg, 90% yield) as a colorless oil.

<sup>1</sup>H NMR (400 MHz, Chloroform-*d*) δ 8.34 (t, *J* = 1.2 Hz, 1H), 7.39 (dd, *J* = 2.8, 1.6 Hz, 1H), 7.32 – 7.24 (m, 3H), 6.98 (ddd, *J* = 7.6, 2.8, 1.6 Hz, 1H), 6.93 – 6.89 (m, 2H), 6.81 (ddd, *J* = 8.0, 2.4, 0.8 Hz, 1H), 4.79 (d, *J* =

1.6 Hz, 2H), 3.83 (s, 3H), 3.79 (s, 3H) ppm;  $^{13}\text{C}\{^1\text{H}\}$  NMR (100 MHz, Chloroform-*d*)  $\delta$  162.1, 159.9, 159.8, 140.8, 137.5, 129.6, 129.6, 121.7, 120.4, 117.7, 113.6, 112.5, 111.6, 64.9, 55.4, 55.2 ppm.

**(*E*)-*N*-(4-methoxybenzyl)-1-(4-methoxyphenyl)methanimine (**2d**):**

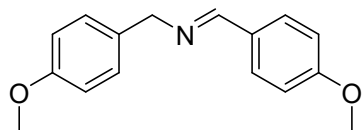

The reaction was performed following the General Procedure with (4-methoxyphenyl)methanamine **1d** (54.88 mg, 0.4 mmol). The crude material was purified by flash chromatography on deactivated silica gel (eluted with EtOAc : hexanes = 1:25) to give the product **2d** (42.38 mg, 83% yield) as a colorless oil.

$^1\text{H}$  NMR (400 MHz, Chloroform-*d*)  $\delta$  8.28 (s, 1H), 7.70 (d,  $J$  = 8.4 Hz, 2H), 7.24 (d,  $J$  = 8.4 Hz, 2H), 6.92 – 6.85 (m, 4H), 4.71 (s, 2H), 3.81 (d,  $J$  = 0.8 Hz, 3H), 3.77 (d,  $J$  = 0.8 Hz, 3H) ppm;  $^{13}\text{C}\{^1\text{H}\}$  (100 MHz, Chloroform-*d*)  $\delta$  161.7, 161.1, 158.6, 131.6, 129.9, 129.2, 129.1, 114.0, 113.9, 64.4, 55.4, 55.3 ppm.

**(*E*)-*N*-(2-fluorobenzyl)-1-(2-fluorophenyl)methanimine (**2e**):**

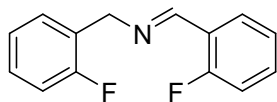

The reaction was performed following the General Procedure with (2-fluorophenyl)methanamine **1e** (50.06 mg, 0.4 mmol). The crude material was purified by flash chromatography on deactivated silica gel (eluted with EtOAc : hexanes = 1:25) to give the product **2e** (45.32 mg, 98% yield) as a colorless oil.

$^1\text{H}$  NMR (400 MHz, Chloroform-*d*)  $\delta$  8.72 (d,  $J$  = 1.6 Hz, 1H), 8.03 (td,  $J$  = 7.6, 1.6 Hz, 1H), 7.42–7.35 (m, 2H), 7.28 – 7.24 (m, 1H), 7.18 – 7.03 (m, 4H), 4.87 (t,  $J$  = 1.2 Hz, 2H) ppm;  $^{13}\text{C}\{^1\text{H}\}$  NMR (100 MHz, Chloroform-*d*)  $\delta$  163.6, 162.0, 161.1, 159.6, 156.1 (d,  $J_{\text{C-F}}$  = 5.0 Hz), 132.5 (d,  $J_{\text{C-F}}$  = 8.5 Hz), 130.2 (d,  $J_{\text{C-F}}$  = 4.4 Hz), 128.9 (d,  $J_{\text{C-F}}$  = 8.1 Hz), 127.8 (d,  $J_{\text{C-F}}$  = 2.8 Hz), 126.1 (d,  $J_{\text{C-F}}$  = 14.8 Hz), 124.4 (d,  $J_{\text{C-F}}$  = 3.2 Hz), 124.2 (d,  $J_{\text{C-F}}$  = 3.7 Hz), 123.7 (d,  $J_{\text{C-F}}$  = 9.0 Hz), 115.8 (d,  $J_{\text{C-F}}$  = 21.2 Hz), 115.3 (d,  $J_{\text{C-F}}$  = 21.3 Hz), 58.6 (d,  $J_{\text{C-F}}$  = 2.9 Hz) ppm.

**(*E*)-*N*-(3-fluorobenzyl)-1-(3-fluorophenyl)methanimine (**2f**):**

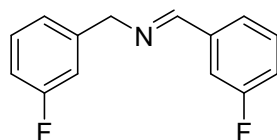

The reaction was performed following the General Procedure with (3-fluorophenyl)methanamine **1f** (50.06 mg, 0.4 mmol). The crude material was purified by flash chromatography on deactivated silica gel (eluted with EtOAc : hexanes = 1:25) to give the product **2f** (43.94 mg, 95% yield) as a colorless oil.

$^1\text{H}$  NMR (400 MHz, Chloroform-*d*)  $\delta$  8.35 (d,  $J$  = 1.6 Hz, 1H), 7.56 – 7.49 (m, 2H), 7.38 (td,  $J$  = 8.0, 5.2 Hz, 1H), 7.30 (td,  $J$  = 8.0, 6.0 Hz, 1H), 7.15–7.09 (m, 2H), 7.05 (dt,  $J$  = 9.6, 2.0 Hz, 1H), 6.95 (td,  $J$  = 8.8, 2.8 Hz, 1H), 4.80 (s, 2H) ppm;  $^{13}\text{C}\{^1\text{H}\}$  NMR (100 MHz, Chloroform-*d*)  $\delta$  164.3 (d,  $J_{\text{C-F}}$  = 5.6 Hz), 161.8 (d,  $J_{\text{C-F}}$  = 4.9 Hz), 161.1 (d,  $J_{\text{C-F}}$  = 2.9 Hz), 141.6 (d,  $J_{\text{C-F}}$  = 7.3 Hz), 138.3 (d,  $J_{\text{C-F}}$  = 7.3 Hz), 130.2 (d,  $J_{\text{C-F}}$  = 8.1 Hz), 130.0 (d,  $J_{\text{C-F}}$  = 8.1 Hz), 124.5 (d,  $J_{\text{C-F}}$  = 2.9 Hz), 123.4 (d,  $J_{\text{C-F}}$  = 2.9 Hz), 117.9 (d,  $J_{\text{C-F}}$  = 21.8 Hz), 114.8 (d,  $J_{\text{C-F}}$  = 21.9 Hz), 114.4 (d,  $J_{\text{C-F}}$  = 22.2 Hz), 114.0 (d,  $J_{\text{C-F}}$  = 21.1 Hz), 64.2 (d,  $J_{\text{C-F}}$  = 2.1 Hz).

**(*E*)-*N*-(4-fluorobenzyl)-1-(4-fluorophenyl)methanimine (2g):**

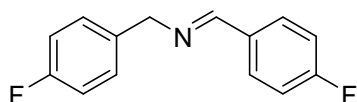

The reaction was performed following the General Procedure with (4-fluorophenyl)methanamine **1g** (50.06 mg, 0.4 mmol). The crude material was purified by flash chromatography on deactivated silica gel (eluted with EtOAc : hexanes = 1:25) to give the product **2g** (43.01 mg, 93% yield) as a colorless oil.

$^1\text{H}$  NMR (400 MHz, Chloroform-*d*)  $\delta$  8.34 (t,  $J$  = 1.6 Hz, 1H), 7.79 – 7.74 (m, 2H), 7.32 – 7.27 (m, 2H), 7.13 – 7.00 (m, 4H), 4.76 (s, 2H) ppm;  $^{13}\text{C}\{^1\text{H}\}$  NMR (100 MHz, Chloroform-*d*)  $\delta$  165.7, 163.2 (d,  $J_{\text{C-F}}$  = 4.3 Hz), 160.8, 160.6, 134.9 (d,  $J_{\text{C-F}}$  = 3.3 Hz), 132.3 (q,  $J_{\text{C-F}}$  = 3.0 Hz), 130.2 (d,  $J_{\text{C-F}}$  = 8.8 Hz), 129.5 (d,  $J_{\text{C-F}}$  = 8.1 Hz), 115.8 (d,  $J_{\text{C-F}}$  = 21.9 Hz), 115.3 (d,  $J_{\text{C-F}}$  = 21.3 Hz), 64.2 ppm.

**(*E*)-*N*-(2-chlorobenzyl)-1-(2-chlorophenyl)methanimine (2h):**

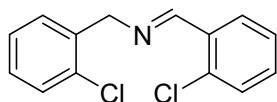

The reaction was performed following the General Procedure with (2-chlorophenyl)methanamine **1h** (56.64 mg, 0.4 mmol). The crude material was purified by flash chromatography on deactivated silica gel (eluted with EtOAc : hexanes = 1:25) to give the product **2h** (47.55 mg, 90% yield) as a colorless oil.

$^1\text{H}$  NMR (400 MHz, Chloroform-*d*)  $\delta$  8.87 (d,  $J$  = 1.6 Hz, 1H), 8.11 (dd,  $J$  = 7.6, 1.6 Hz, 1H), 7.43 – 7.31 (m, 4H), 7.30 – 7.18 (m, 3H), 4.93 (d,  $J$  = 1.2 Hz, 2H) ppm;  $^{13}\text{C}\{^1\text{H}\}$  NMR (100 MHz, Chloroform-*d*)  $\delta$  159.8, 136.9, 135.3, 133.4, 133.1, 131.8, 129.9, 129.7, 129.4, 128.5, 128.4, 127.1, 127.0, 62.2 ppm.

**(*E*)-*N*-(3-chlorobenzyl)-1-(3-chlorophenyl)methanimine (2i):**

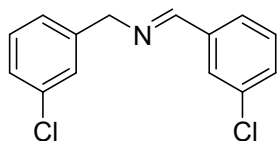

The reaction was performed following the General Procedure with (3-chlorophenyl)methanamine **1i** (56.64 mg, 0.4 mmol). The crude material was purified by flash chromatography on deactivated silica gel (eluted with EtOAc : hexanes = 1:25) to give the product **2i** (48.08 mg, 91% yield) as a colorless oil.

<sup>1</sup>H NMR (400 MHz, Chloroform-*d*) δ 8.32 (t, *J* = 1.6 Hz, 1H), 7.81 (t, *J* = 1.6 Hz, 1H), 7.62 (dt, *J* = 7.6, 1.6 Hz, 1H), 7.42 – 7.29 (m, 3H), 7.28 – 7.20 (m, 3H), 4.77 (d, *J* = 1.2 Hz, 2H) ppm; <sup>13</sup>C{<sup>1</sup>H} NMR (100 MHz, Chloroform-*d*) δ 161.0, 141.0, 137.6, 134.9, 134.4, 131.0, 130.0, 129.8, 128.1, 128.0, 127.3, 126.7, 126.1, 64.3 ppm.

**(*E*)-*N*-(4-chlorobenzyl)-1-(4-chlorophenyl)methanimine (**2j**):**

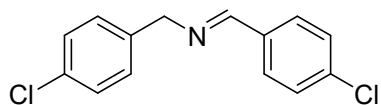

The reaction was performed following the General Procedure with (4-chlorophenyl)methanamine **1j** (56.64 mg, 0.4 mmol). The crude material was purified by flash chromatography on deactivated silica gel (eluted with EtOAc : hexanes = 1:25) to give the product **2j** (50.19 mg, 95% yield) as a colorless oil.

<sup>1</sup>H NMR (400 MHz, Chloroform-*d*) δ 8.33 (t, *J* = 1.2 Hz, 1H), 7.70 (dt, *J* = 8.8, 2.4 Hz, 2H), 7.38 (dt, *J* = 8.4, 2.4 Hz, 2H), 7.31 (dt, *J* = 8.4, 2.4 Hz, 2H), 7.27 – 7.24 (m, 2H), 4.86 (t, *J* = 0.8 Hz, 2H) ppm; <sup>13</sup>C{<sup>1</sup>H} NMR (100 MHz, Chloroform-*d*) δ 160.9, 137.6, 136.9, 134.4, 132.9, 129.5, 129.3, 129.0, 128.7, 64.2 ppm.

**(*E*)-1-(thiophen-2-yl)-*N*-(thiophen-2-ylmethyl)methanimine (**2k**):**

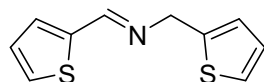

The reaction was performed following the General Procedure with thiophen-2-ylmethanamine **1k** (27.44 mg, 0.2 mmol). The crude material was purified by flash chromatography on deactivated silica gel (eluted with EtOAc : hexanes = 1:25) to give the product **2k** (33.17 mg, 80% yield) as a colorless oil.

<sup>1</sup>H NMR (400 MHz, Chloroform-*d*) δ 8.40 (t, *J* = 1.2 Hz, 1H), 7.41 (dt, *J* = 5.2, 1.2 Hz, 1H), 7.32 (dd, *J* = 3.6, 1.2 Hz, 1H), 7.23 (dd, *J* = 4.8, 1.6 Hz, 1H), 7.06 (dd, *J* = 4.8, 3.6 Hz, 1H), 6.99 – 6.95 (m, 2H), 4.94 (t, *J* = 1.2 Hz, 2H) ppm; <sup>13</sup>C{<sup>1</sup>H} NMR (100 MHz, Chloroform-*d*) δ 155.5, 142.1, 141.5, 131.1, 129.5, 127.5, 127.0, 125.4, 124.9, 58.5 ppm.

**Table S1.** Crystallographic data and structure refinement details for compound **1**.

| Complex                                                                                                        | <b>1</b>                                                                         |
|----------------------------------------------------------------------------------------------------------------|----------------------------------------------------------------------------------|
| Chemical formula                                                                                               | C <sub>24</sub> H <sub>33</sub> N <sub>5</sub> O <sub>21</sub> W <sub>5</sub> Zn |
| formula weight                                                                                                 | 1712.17                                                                          |
| crystal system                                                                                                 | triclinic                                                                        |
| space group                                                                                                    | <i>P</i> -1                                                                      |
| <i>a</i> (Å)                                                                                                   | 11.6641(6)                                                                       |
| <i>b</i> (Å)                                                                                                   | 12.2880(6)                                                                       |
| <i>c</i> (Å)                                                                                                   | 17.5529(6)                                                                       |
| $\alpha$ (deg)                                                                                                 | 104.503(4)                                                                       |
| $\beta$ (deg)                                                                                                  | 102.541(4)                                                                       |
| $\gamma$ (deg)                                                                                                 | 105.931(4)                                                                       |
| <i>V</i> (Å <sup>3</sup> )                                                                                     | 2228.95(19)                                                                      |
| <i>Z</i>                                                                                                       | 2                                                                                |
| $\rho_{\text{calc}}$ (g/cm <sup>3</sup> )                                                                      | 2.551                                                                            |
| $\mu$ (Mo K $\alpha$ ) (mm <sup>-1</sup> )                                                                     | 13.454                                                                           |
| F(000)                                                                                                         | 1560                                                                             |
| collected reflns                                                                                               | 15783                                                                            |
| unique reflns/ <i>R</i> <sub>int</sub>                                                                         | 7317/0.0273                                                                      |
| no. of observations                                                                                            | 6072                                                                             |
| GOF                                                                                                            | 1.042                                                                            |
| <i>R</i> <sub>1</sub> <sup>a</sup> , <i>wR</i> <sub>2</sub> <sup>b</sup> ( <i>I</i> > 2 $\sigma$ ( <i>I</i> )) | 0.0346, 0.0932                                                                   |
| <i>R</i> <sub>1</sub> <sup>a</sup> , <i>wR</i> <sub>2</sub> <sup>b</sup> (all data)                            | 0.0450, 0.0972                                                                   |

<sup>a</sup>  $R_1 = \sum ||F_o| - |F_c|| / \sum |F_o|$ . <sup>b</sup>  $wR_2 = [\sum w(F_o^2 - F_c^2)^2 / \sum w(F_o^2)]^{1/2}$ .

Table S2. Photocatalytic oxidation of benzylamine to imine over different material catalysts

| Catalyst                                                                    | Light source                       | Conditions                                                                                     | Conversion | Ref.      |
|-----------------------------------------------------------------------------|------------------------------------|------------------------------------------------------------------------------------------------|------------|-----------|
| PCN-222                                                                     | Xe lamp                            | r.t. air, 1 h, 0.1 mmol benzylamine, 5 mg PCN-222, 3 mL CH <sub>3</sub> CN                     | 100%       | S1        |
| NH <sub>2</sub> -MIL-125 (Ti)                                               | visible light                      | r.t. O <sub>2</sub> , 12 h, 0.1 mmol benzylamine, 5 mg catalyst, 2 mL CH <sub>3</sub> CN       | 73%        | S2        |
| Zn-PDI                                                                      | Xe lamp (500 W)                    | r.t. air, 4 h, 1 mmol benzylamine, 0.01 mmol Zn-PDI, 5 mL CH <sub>3</sub> CN                   | 74%        | S3        |
| FJI-Y10                                                                     | Xe lamp (300 W)                    | 40 °C, O <sub>2</sub> , 6 h, 1.0 mmol benzylamine, 10 mg FJI-Y10, 5 mL DMF                     | 100%       | S4        |
| Zn-MOF                                                                      | Xe arc lamp (300 W)                | r.t. O <sub>2</sub> , 1 h, 0.2 mmol benzylamine, 5 mg Zn-MOF, 1 mL CH <sub>3</sub> CN          | 99%        | S5        |
| Zn-bpydc                                                                    | Xe lamp (300 W) with full spectrum | 25 °C, air, 4 h, 0.5 mmol benzylamine, 10 mg Zn-bpydc, 5 mL DMF                                | 99.7%      | S6        |
| Mn-MOF                                                                      | Xe lamp (300 W)                    | r.t. O <sub>2</sub> , 1 h, 0.2 mmol benzylamine, 6 mg Mn-MOF, 1 mL DMA/DMF                     | 99%        | S7        |
| Cd(dcbpy)                                                                   | Xe lamp (300 W) with full spectrum | 25 °C, air, 7 h, 0.48 mmol benzylamine, 10 mg catalyst, 5 mL DMF                               | 99%        | S8        |
| RPF-30-Er                                                                   | 100 W warming lamp                 | 25 °C, O <sub>2</sub> , 18 h, 0.05 mmol benzylamine, 10 mol% catalyst, 1 mL CH <sub>3</sub> CN | 76%        | S9        |
| NNU-45                                                                      | Xe lamp (300 W)                    | r.t. O <sub>2</sub> , 160 min, 0.2 mmol benzylamine, 4 mg catalyst, 1 mL DMSO                  | 99%        | S10       |
| NH <sub>2</sub> -UiO-66                                                     | Xe lamp (350 W) with full spectrum | r.t. air, 10 h, 0.1 mmol benzylamine, 15 mg NH <sub>2</sub> -UiO-66, 5 mL CH <sub>3</sub> CN   | 83%        | S11       |
| Pd(1.0)/MIL-125-NH <sub>2</sub>                                             | Xe lamp (300 W) 360–780 nm         | r.t. O <sub>2</sub> , 3 h, 0.05 mmol benzylamine, 5 mg photocatalyst, 2 mL CH <sub>3</sub> CN  | 94.08%     | S12       |
| Ru(bpy) <sub>3</sub> @MIL-125                                               | Xe lamp (300 W)                    | r.t. air, 3 h, 0.1 mmol benzylamine, 5 mg catalyst, 3 mL CH <sub>3</sub> CN                    | 100%       | S13       |
| CNUIO-5                                                                     | Xe lamp (300 W)                    | r.t. O <sub>2</sub> , 5 h, 0.05 mmol benzylamines, 5 mg CNUIO-5, 5 mL CH <sub>3</sub> CN       | 58.9%      | S14       |
| CdS@MIL-101                                                                 | Xe lamp (300 W)                    | Ice bath, air, 9 h, 0.1 mmol benzylamine, 50 mg catalyst, 2 mL toluene                         | 100%       | S15       |
| Zn <sub>2</sub> (DPNDI)(W <sub>10</sub> O <sub>32</sub> )(DMA) <sub>6</sub> | LED lamp (100W)                    | r.t. air, 24 h, 0.2 mmol benzylamine, 3.42 mg catalyst, 5 mL DMF                               | 99%        | This work |

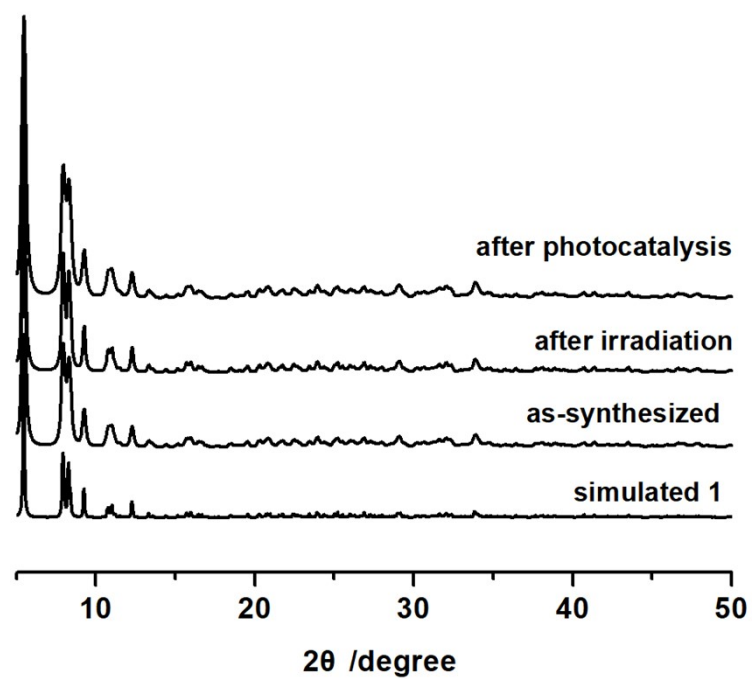

Figure S1. The XRD patterns of compound 1 after different treatment.

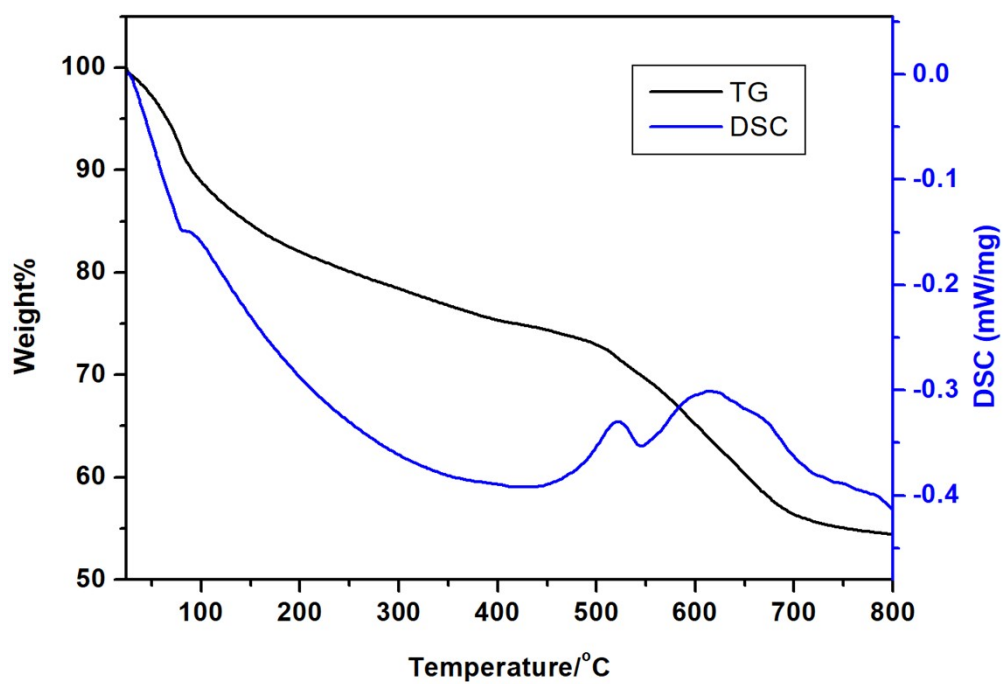

Figure S2. TGA and DSC curves of compound 1 under  $\text{N}_2$  atmosphere with a heating rate of  $10^\circ\text{C}/\text{min}$ .

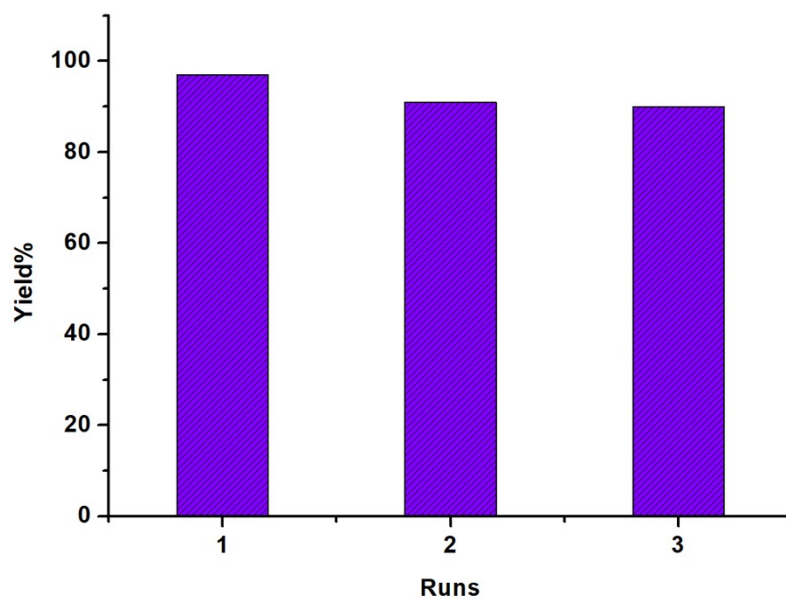

Figure S3. The recycle experiments for oxidative coupling of amines by using compound 1 as catalyst.

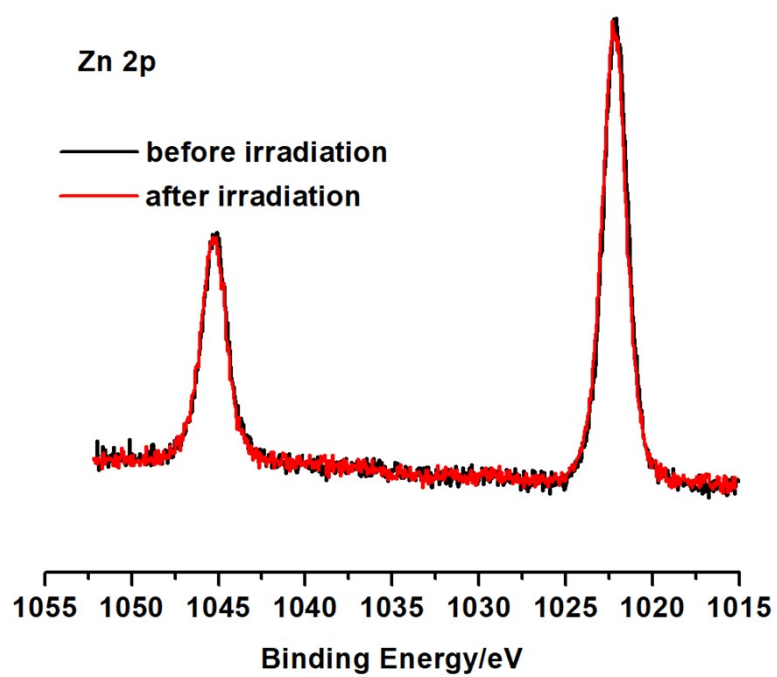

Figure S4. Zn 2p XPS core-level spectra of compound 1 before and after irradiation.

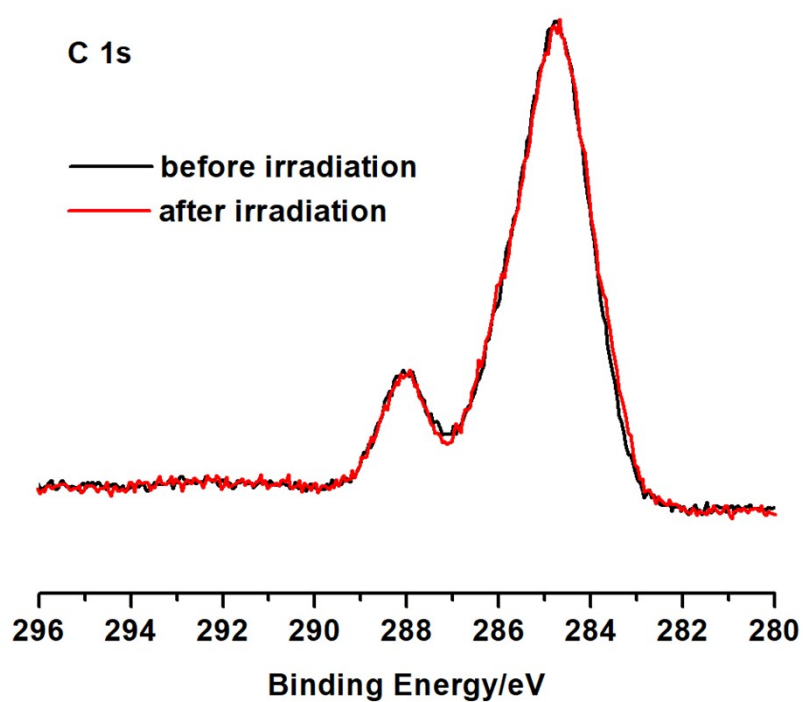

Figure S5. C 1s XPS core-level spectra of compound 1 before and after irradiation.

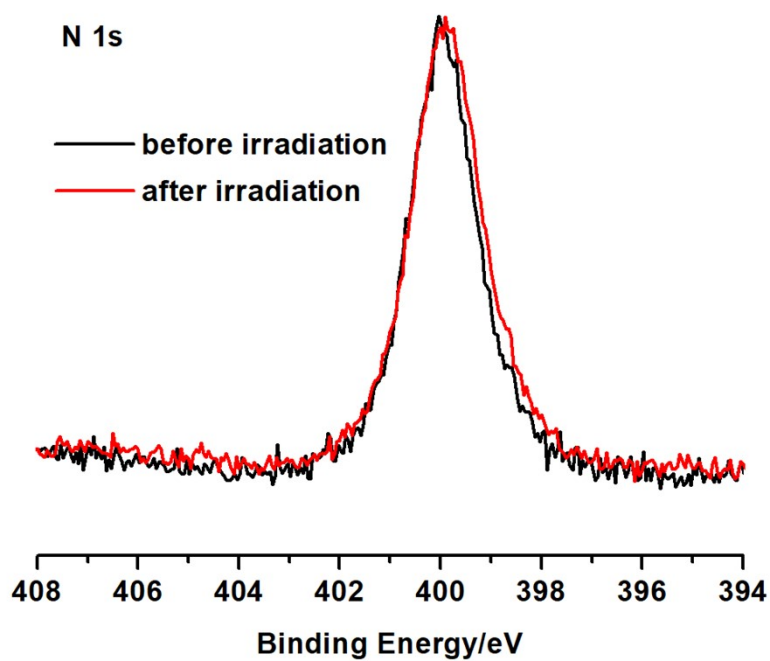

Figure S6. N 1s XPS core-level spectra of compound 1 before and after irradiation.

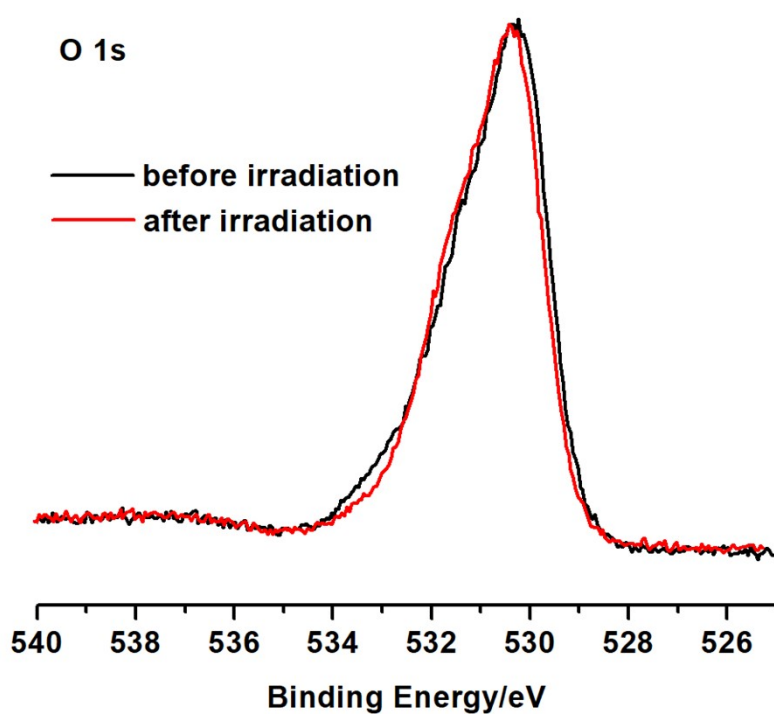

Figure S7. O 1s XPS core-level spectra of compound 1 before and after irradiation.

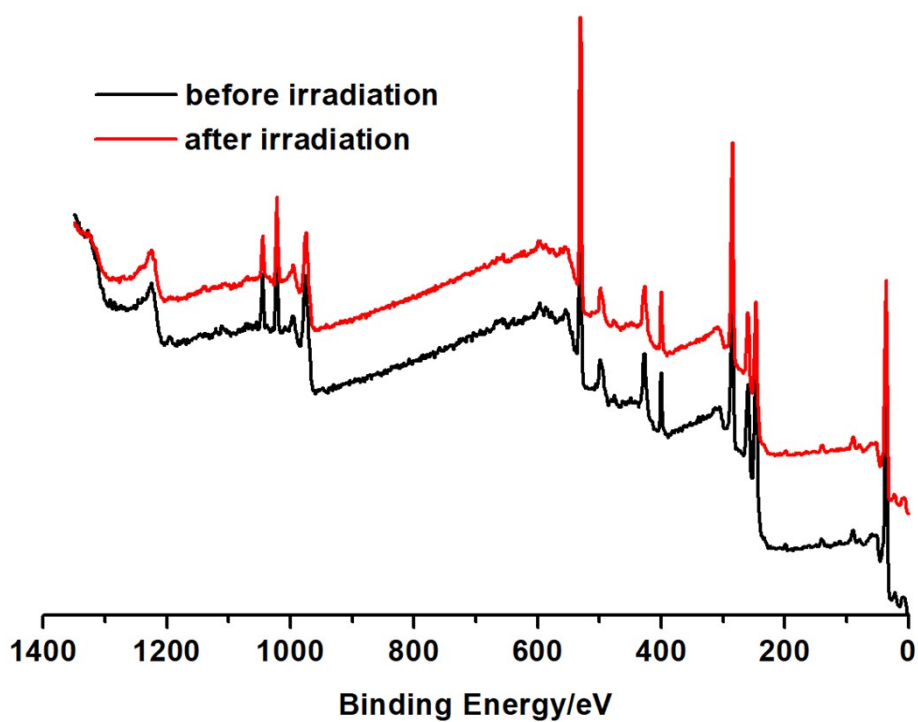

Figure S8. Survey XPS core-level spectra of compound 1 before and after irradiation.

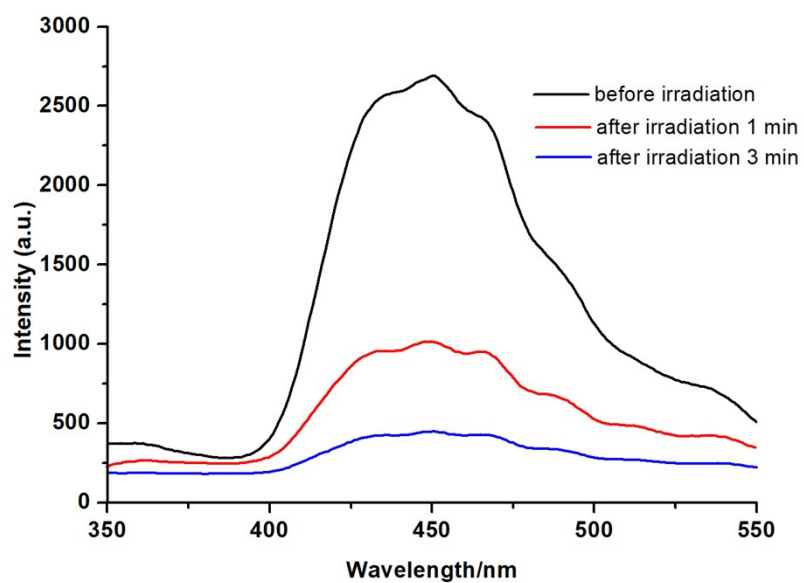

Figure S9. Fluorescence spectra of compound 1 at room temperature in air ( $\lambda_{\text{ex}} = 300$  nm).

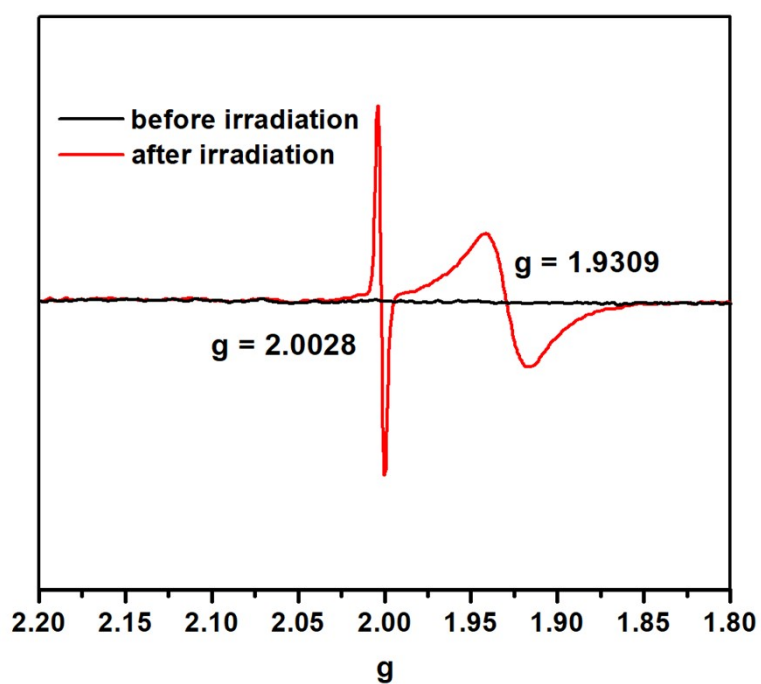

Figure S10. EPR spectra of the original and colored sample of compound 1.

## NMR Spectra

Figure S11.  $^1\text{H}$  NMR spectra (400 MHz, Chloroform- $d$ ) of (*E*)-*N*-benzyl-1-phenylmethanimine (2a):

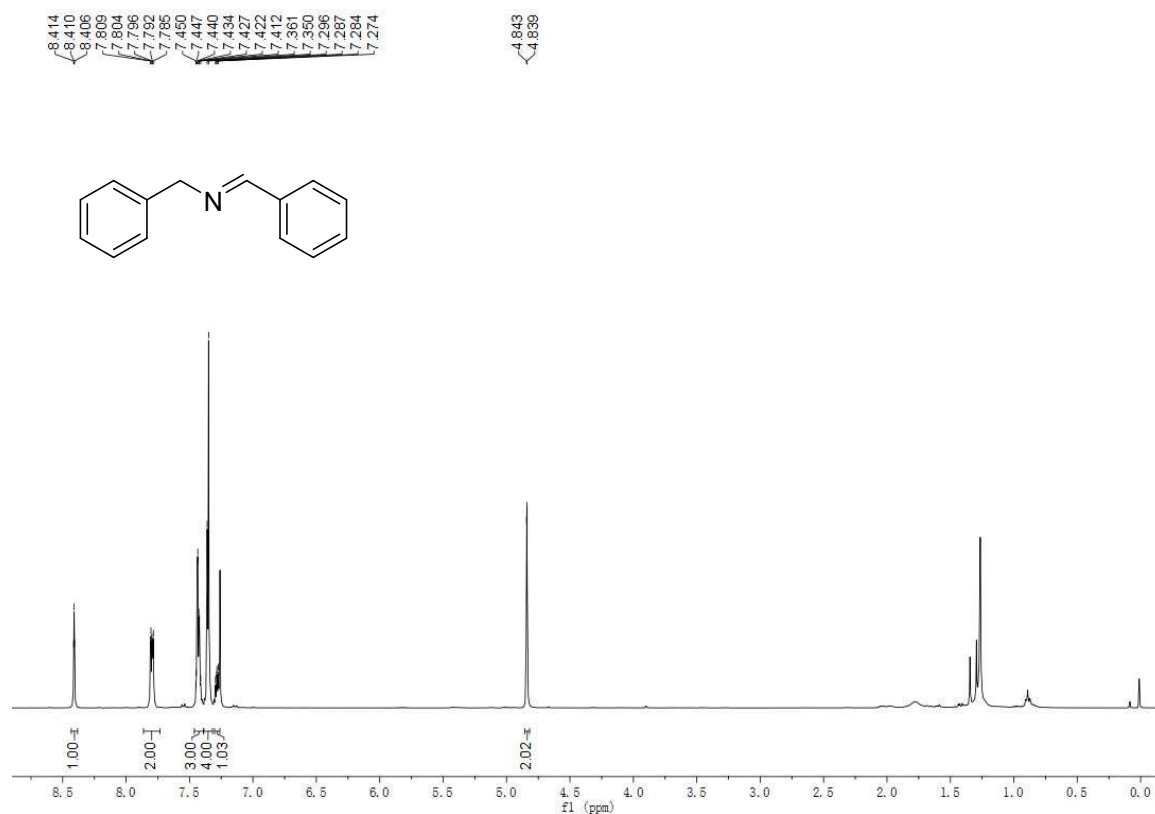

Figure S12.  $^{13}\text{C}\{^1\text{H}\}$  NMR spectra (100 MHz, Chloroform- $d$ ) of (*E*)-*N*-benzyl-1-phenylmethanimine (2a):

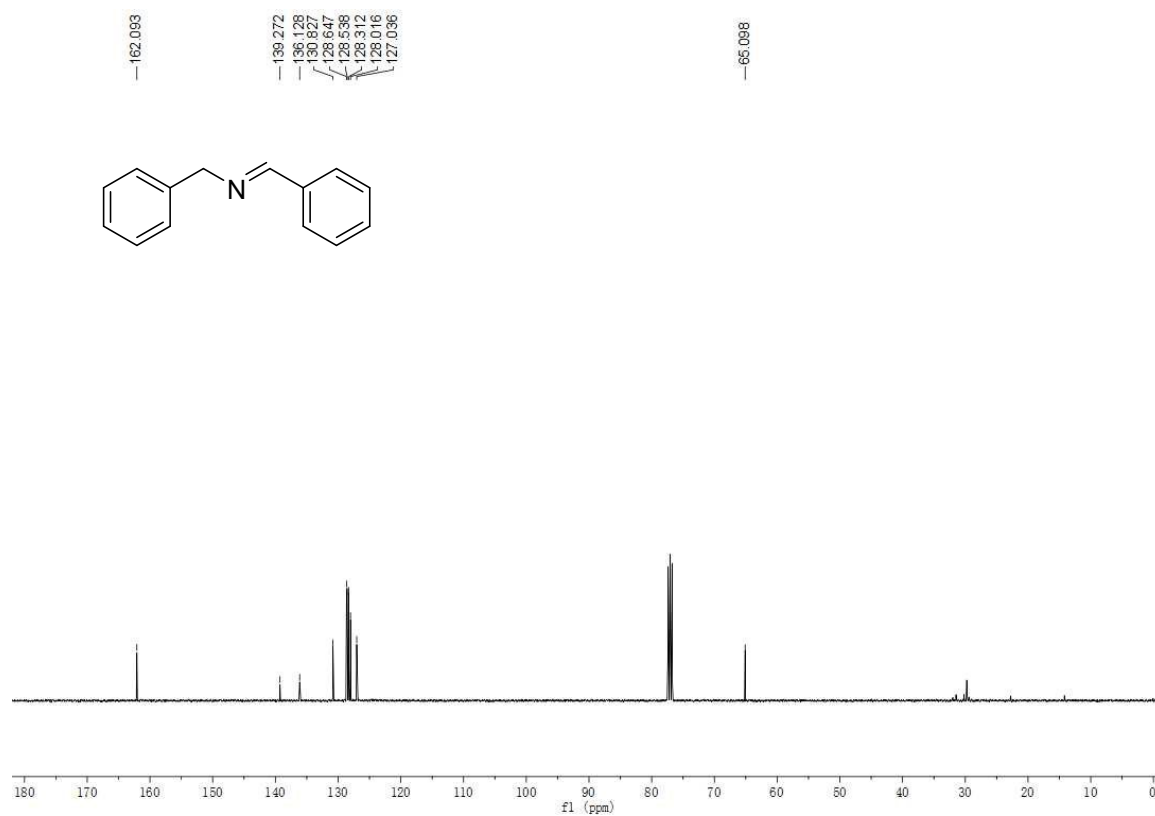

**Figure S13.**  $^1\text{H}$  NMR spectra (400 MHz, Chloroform-*d*) of (*E*)-*N*-(2-methoxybenzyl)-1-(2-methoxyphenyl)methanimine (**2b**):

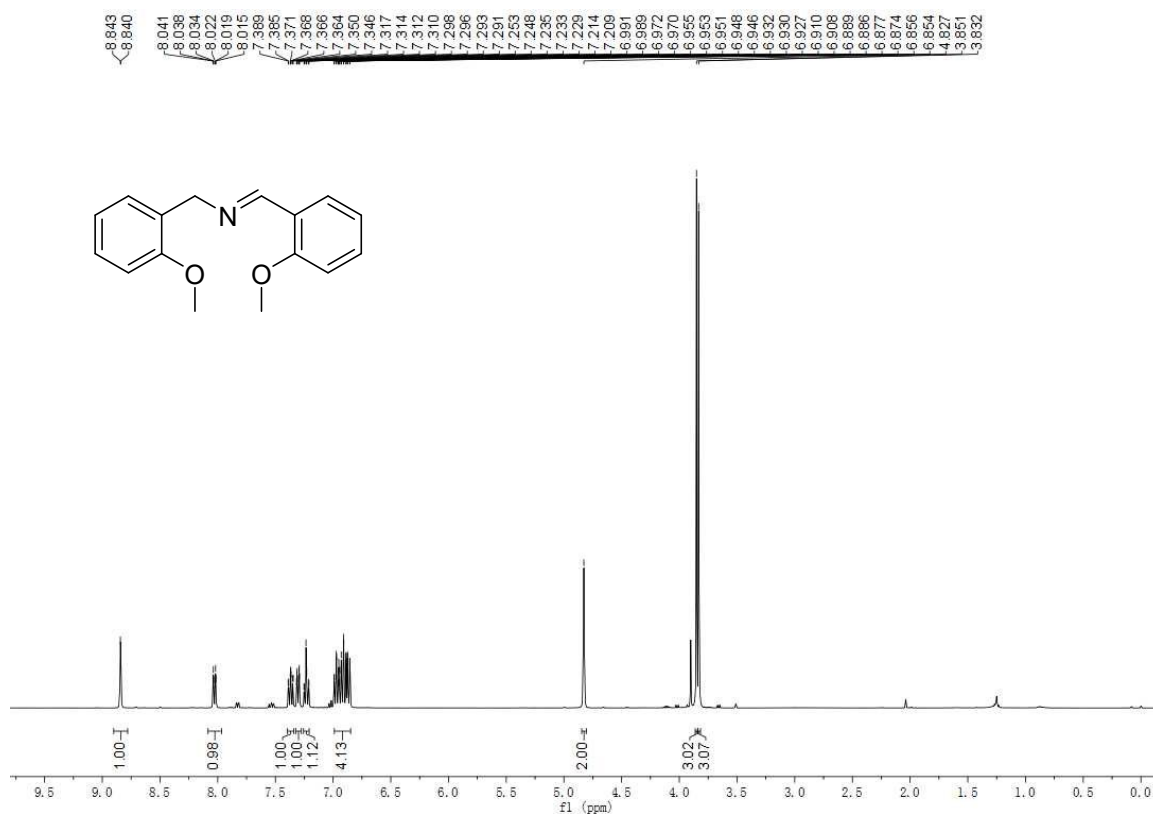

**Figure S14.**  $^{13}\text{C}\{^1\text{H}\}$  NMR spectra (100 MHz, Chloroform-*d*) of (*E*)-*N*-(2-methoxybenzyl)-1-(2-methoxyphenyl)methanimine (**2b**):

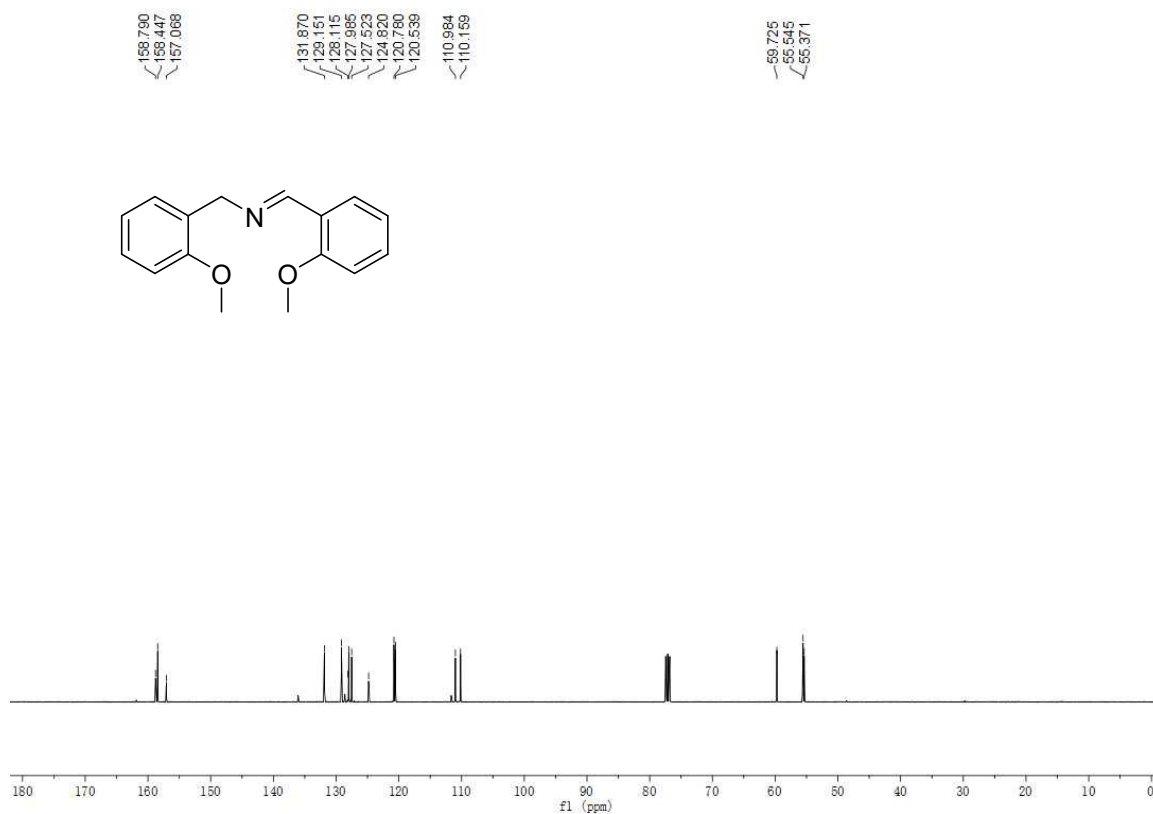

**Figure S15.**  $^1\text{H}$  NMR spectra (400 MHz, Chloroform-*d*) of (*E*)-*N*-(3-methoxybenzyl)-1-(3-methoxyphenyl)methanimine (**2c**):

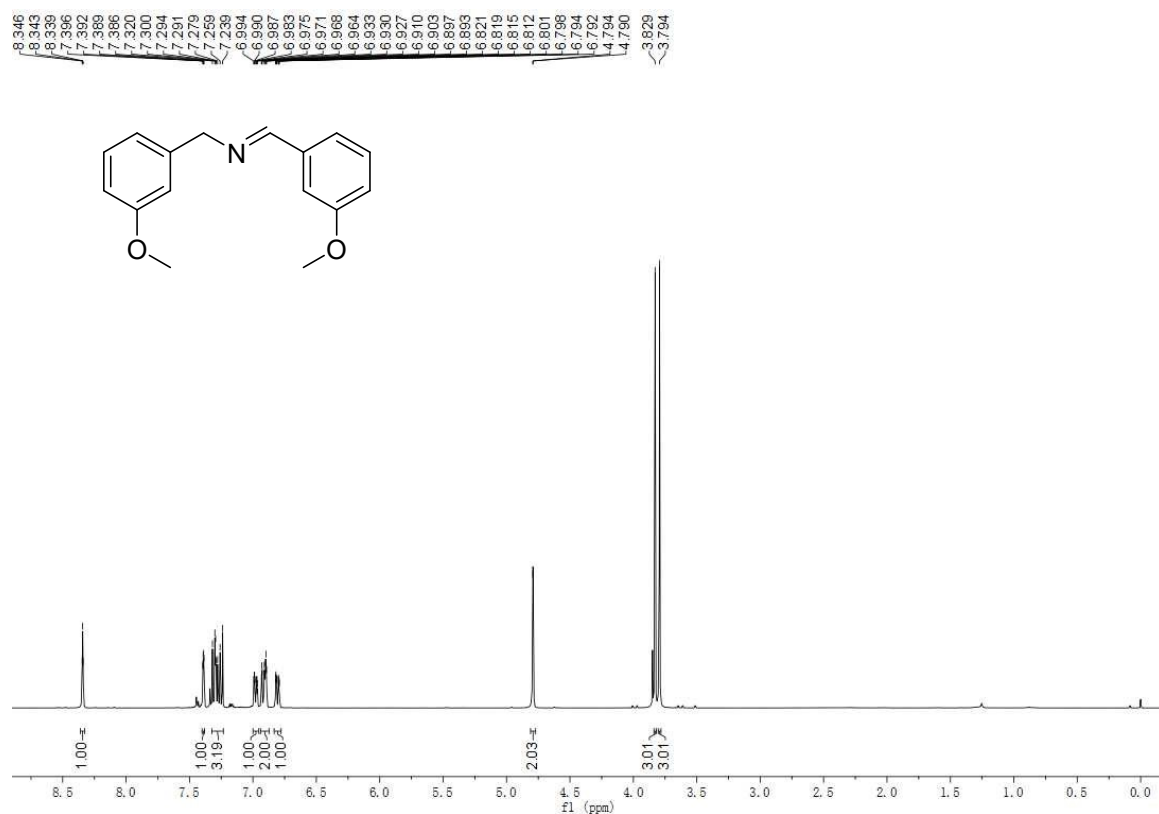

**Figure S16.**  $^{13}\text{C}\{^1\text{H}\}$  NMR spectra (100 MHz, Chloroform-*d*) of (*E*)-*N*-(3-methoxybenzyl)-1-(3-methoxyphenyl)methanimine (**2c**):

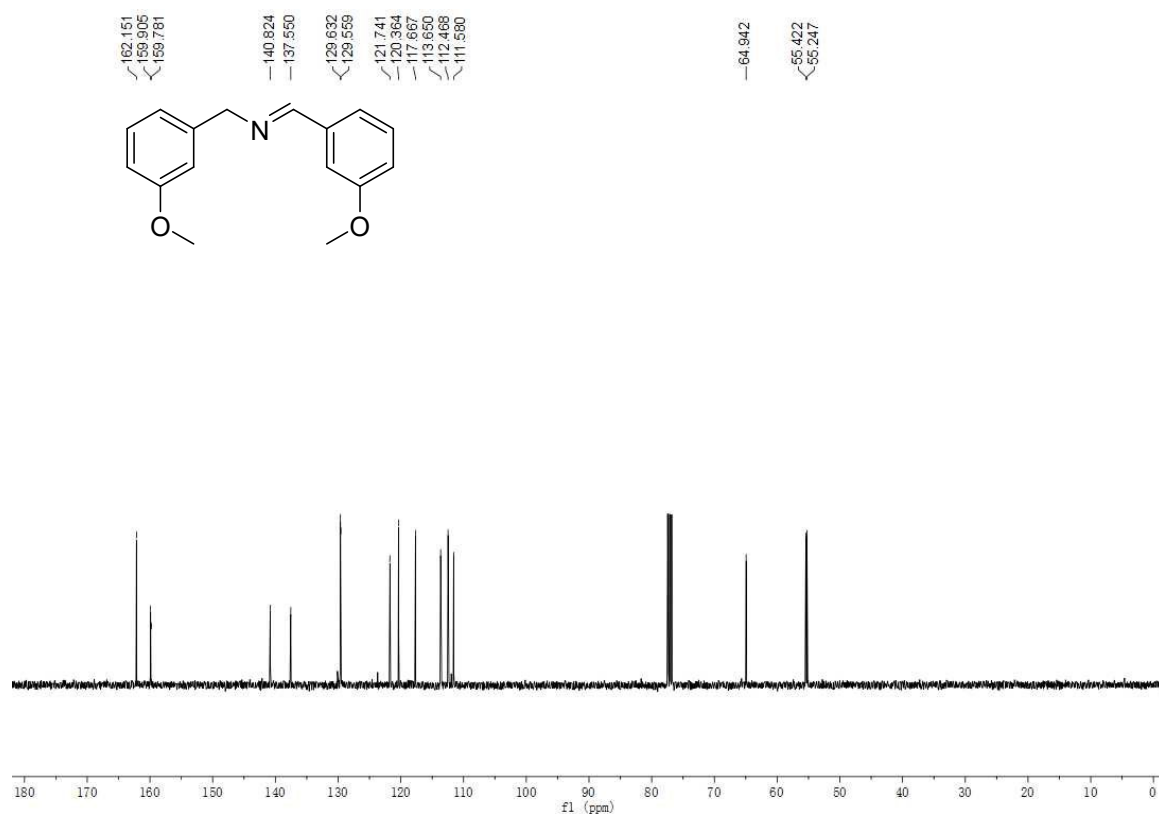

**Figure S17.**  $^1\text{H}$  NMR spectra (400 MHz, Chloroform-*d*) of (*E*)-*N*-(4-methoxybenzyl)-1-(4-methoxyphenyl)methanimine (**2d**):

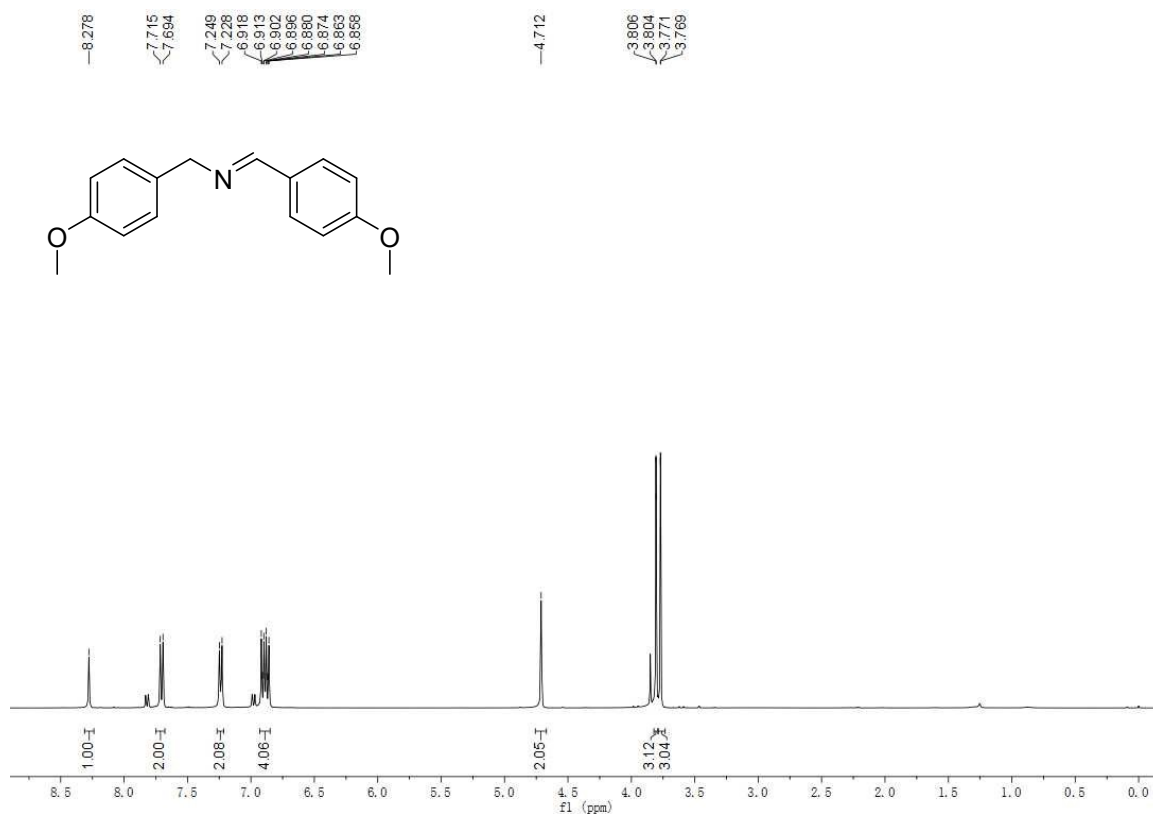

**Figure S18.**  $^{13}\text{C}\{^1\text{H}\}$  NMR spectra (100 MHz, Chloroform-*d*) of (*E*)-*N*-(4-methoxybenzyl)-1-(4-methoxyphenyl)methanimine (**2d**):

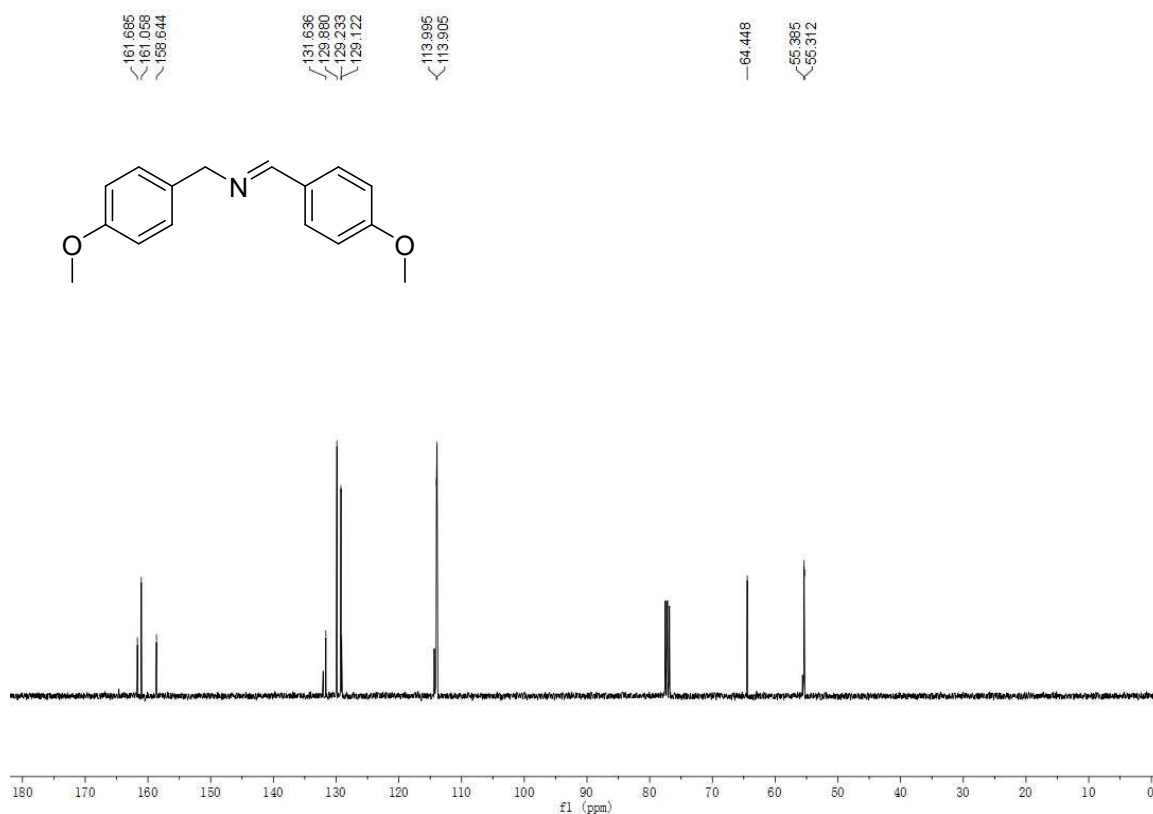

**Figure S19.**  $^1\text{H}$  NMR spectra (400 MHz, Chloroform-*d*) of (*E*)-*N*-(2-fluorobenzyl)-1-(2-fluorophenyl)methanimine (**2e**):

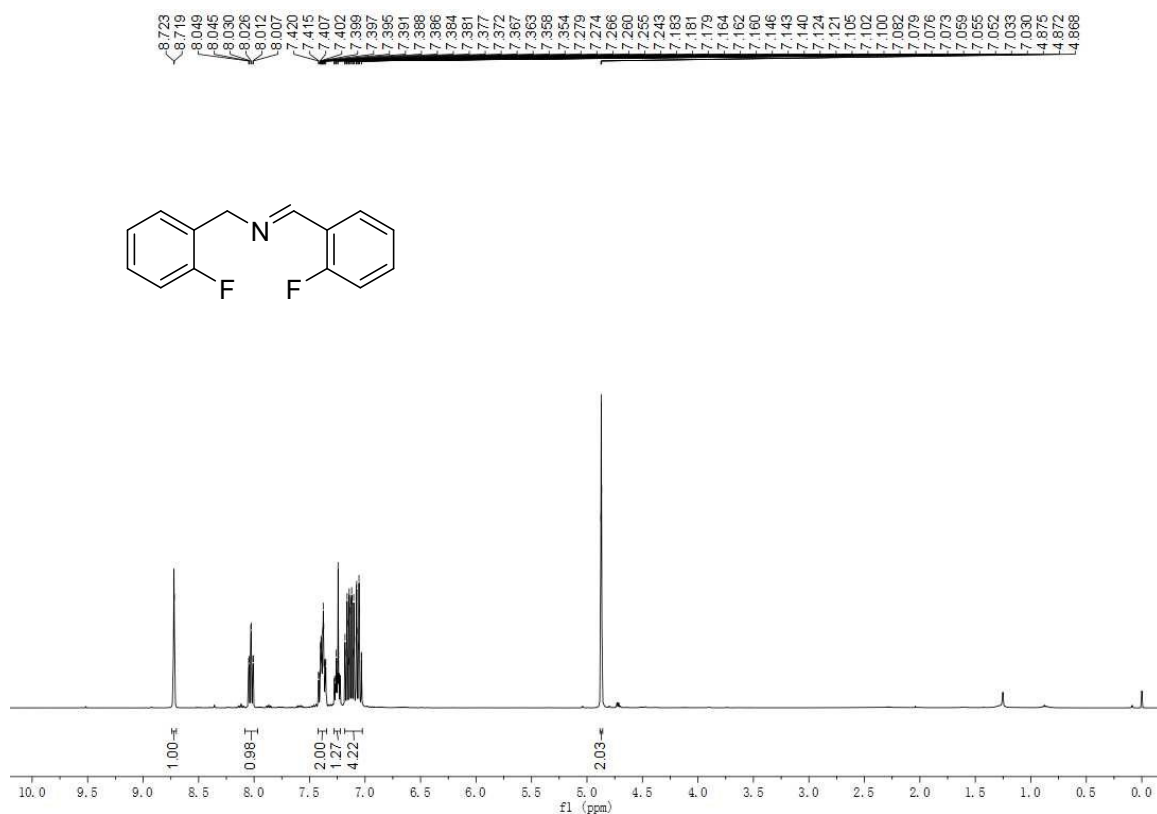

**Figure S20.**  $^{13}\text{C}\{^1\text{H}\}$  NMR spectra (400 MHz, Chloroform-*d*) of (*E*)-*N*-(2-fluorobenzyl)-1-(2-fluorophenyl)methanimine (**2e**):

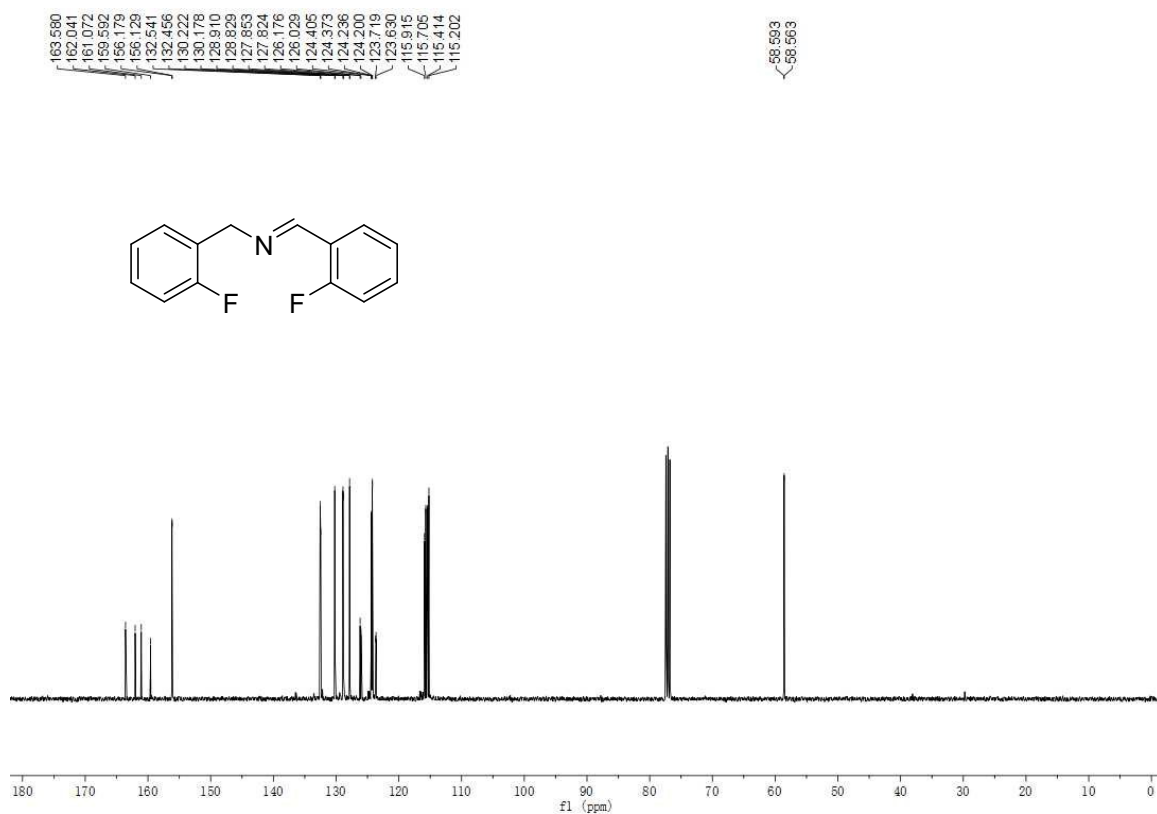

Figure S21.  $^1\text{H}$  NMR spectra (400 MHz, Chloroform-*d*) of (*E*)-*N*-(3-fluorobenzyl)-1-(3-fluorophenyl)methanimine (**2f**):

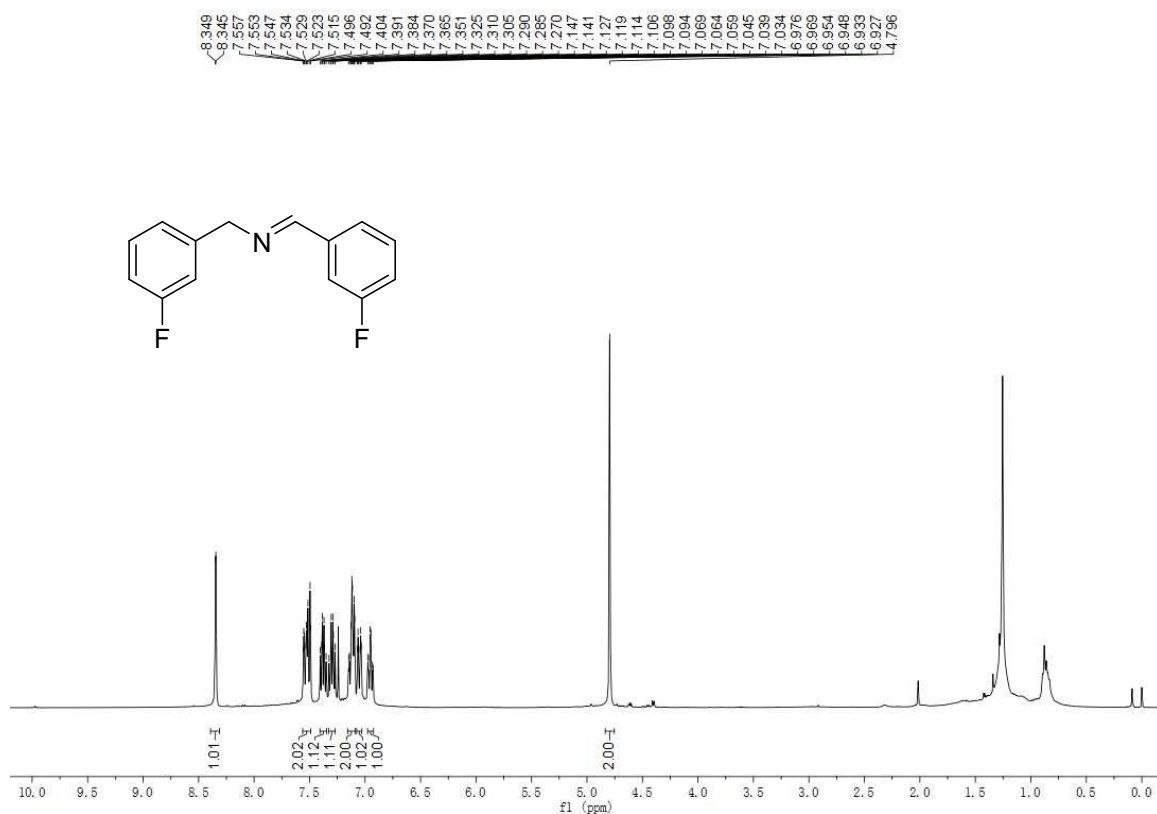

Figure S22.  $^{13}\text{C}\{^1\text{H}\}$  NMR spectra (400 MHz, Chloroform-*d*) of (*E*)-*N*-(3-fluorobenzyl)-1-(3-fluorophenyl)methanimine (**2f**):

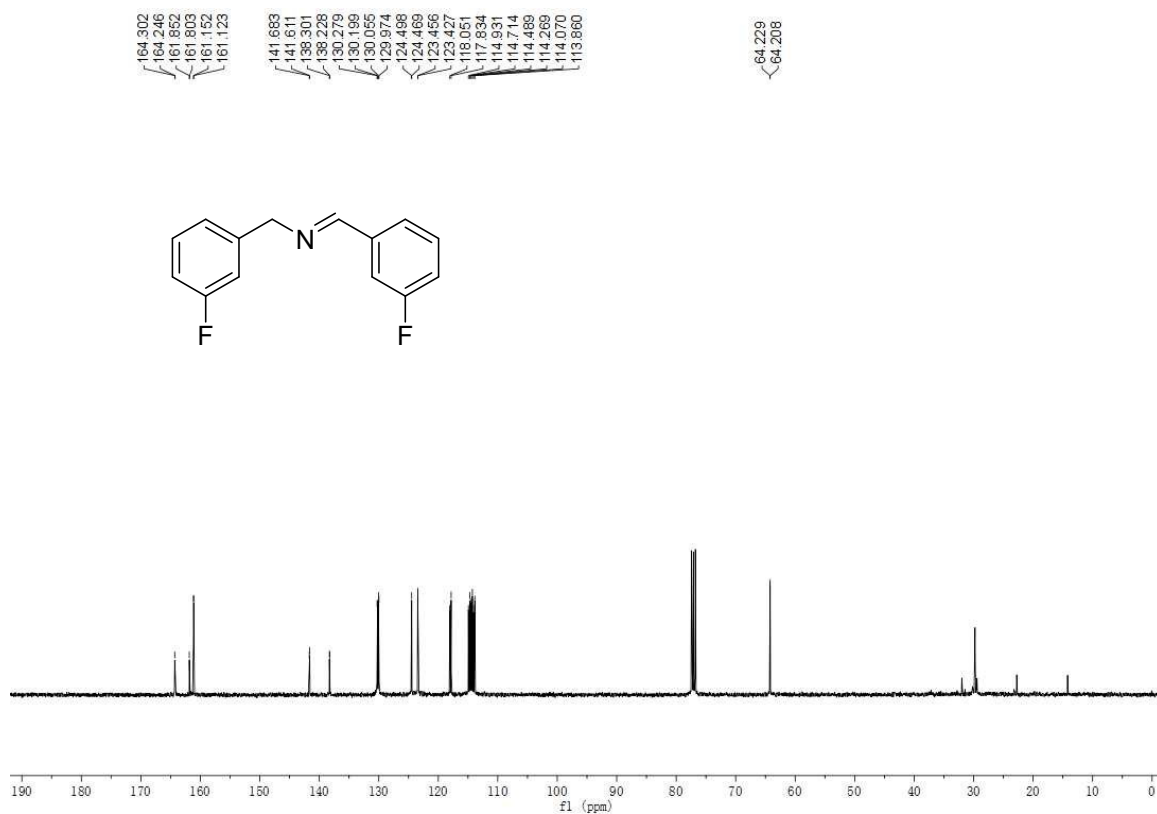

Figure S23.  $^1\text{H}$  NMR spectra (400 MHz, Chloroform-*d*) of (*E*)-*N*-(4-fluorobenzyl)-1-(4-fluorophenyl)methanimine (2g):

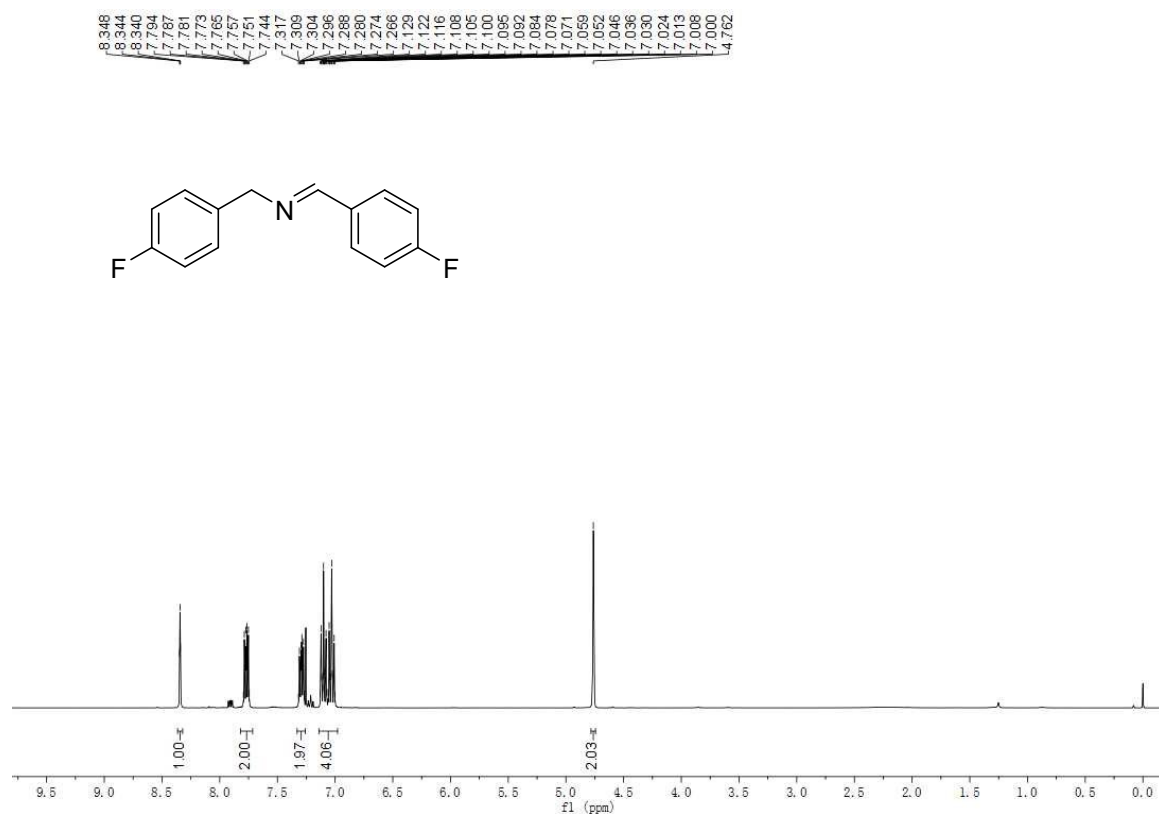

Figure S24.  $^{13}\text{C}\{^1\text{H}\}$  NMR spectra (100 MHz, Chloroform-*d*) of (*E*)-*N*-(4-fluorobenzyl)-1-(4-fluorophenyl)methanimine (2g):

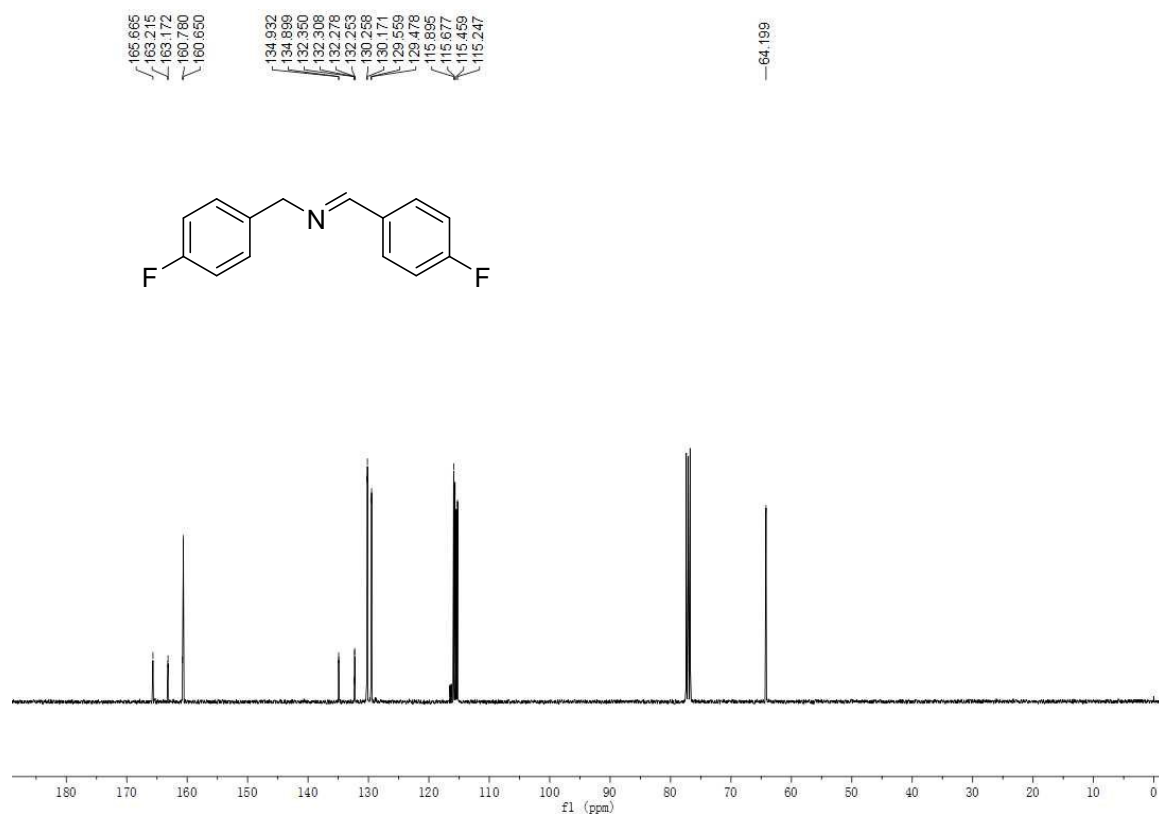

**Figure S25.**  $^1\text{H}$  NMR spectra (400 MHz, Chloroform-*d*) of (*E*)-*N*-(2-chlorobenzyl)-1-(2-chlorophenyl)methanimine (**2h**):

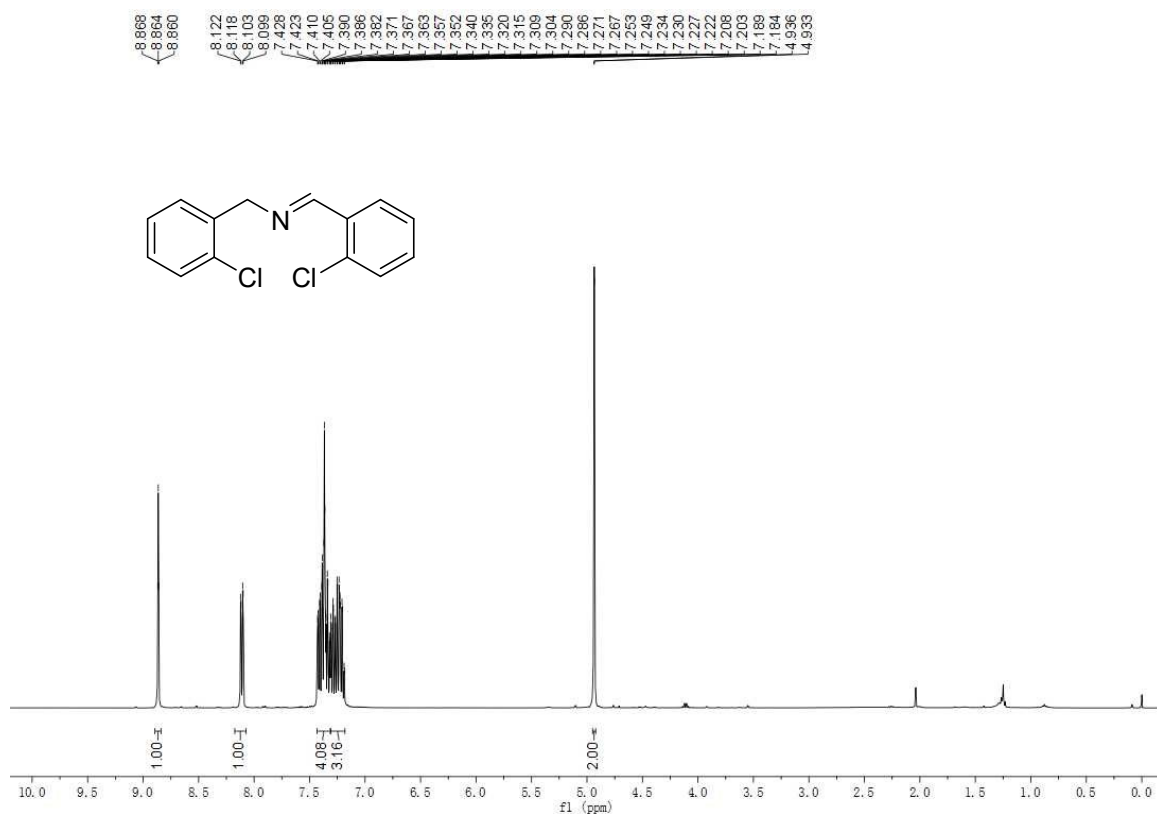

**Figure S26.**  $^{13}\text{C}\{^1\text{H}\}$  NMR spectra (100 MHz, Chloroform-*d*) of (*E*)-*N*-(2-chlorobenzyl)-1-(2-chlorophenyl)methanimine (**2h**):

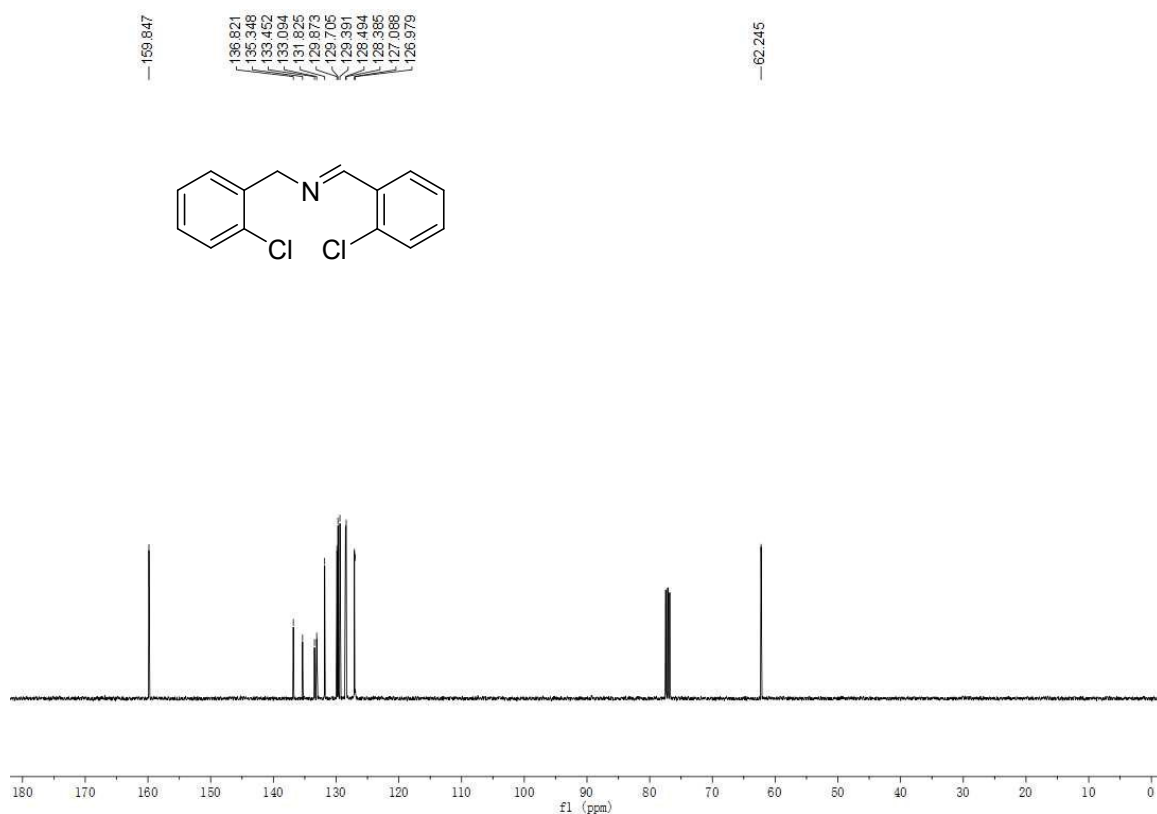

Figure S27.  $^1\text{H}$  NMR spectra (400 MHz, Chloroform-*d*) of (*E*)-*N*-(3-chlorobenzyl)-1-(3-chlorophenyl)methanimine (**2i**):

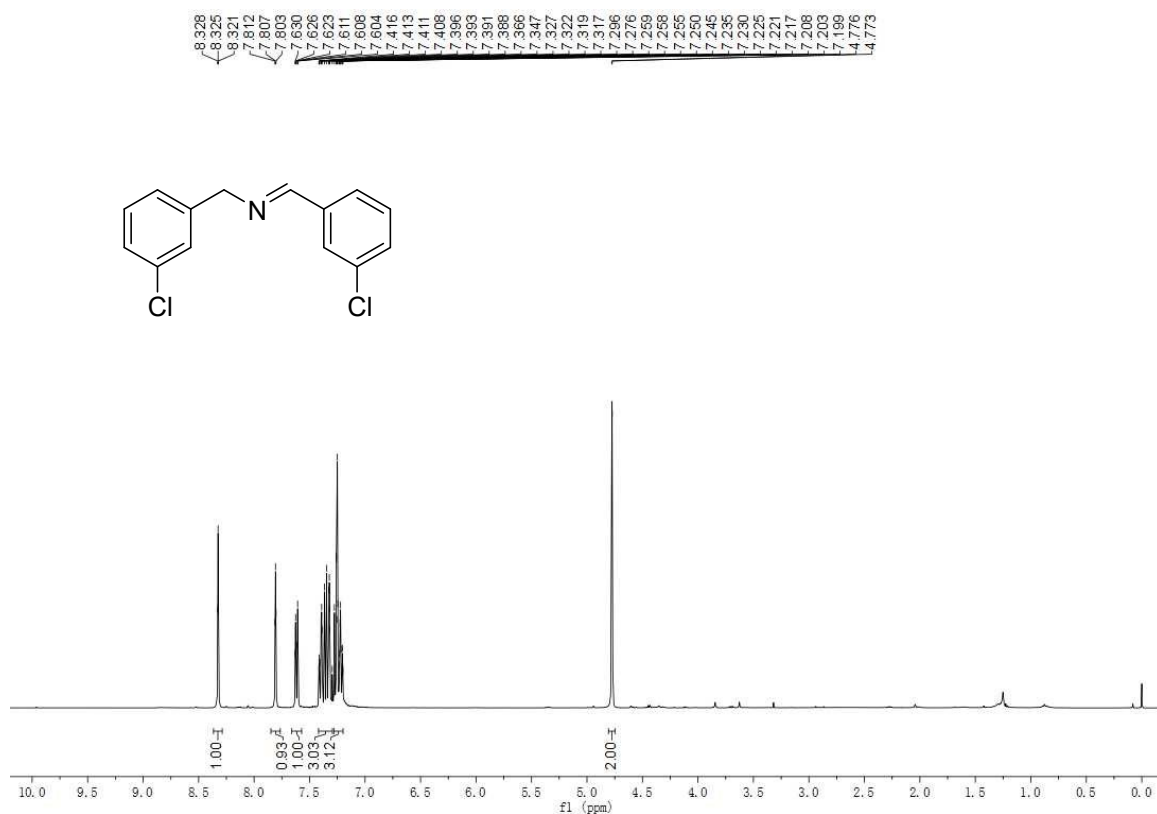

Figure S28.  $^{13}\text{C}\{^1\text{H}\}$  NMR spectra (100 MHz, Chloroform-*d*) of (*E*)-*N*-(3-chlorobenzyl)-1-(3-chlorophenyl)methanimine (**2i**):

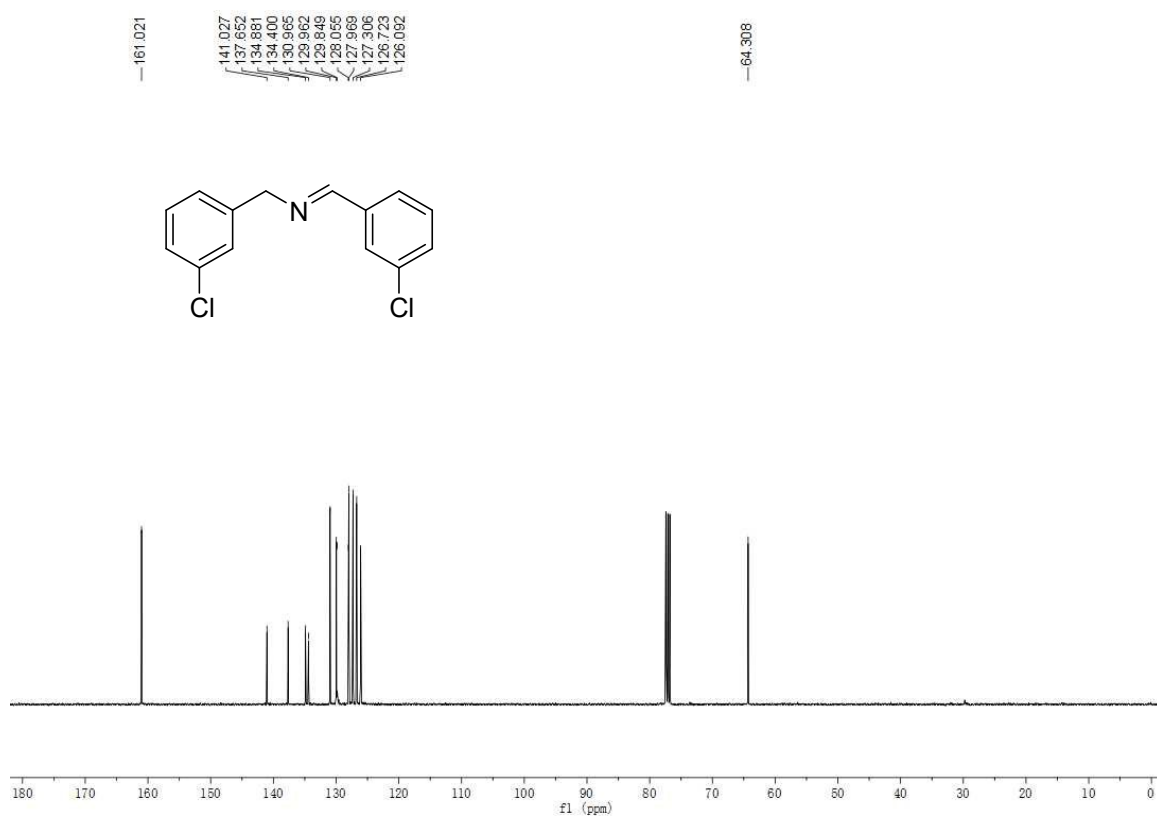

Figure S29.  $^1\text{H}$  NMR spectra (400 MHz, Chloroform- $d$ ) of (*E*)-*N*-(4-chlorobenzyl)-1-(4-chlorophenyl)methanimine (2j):

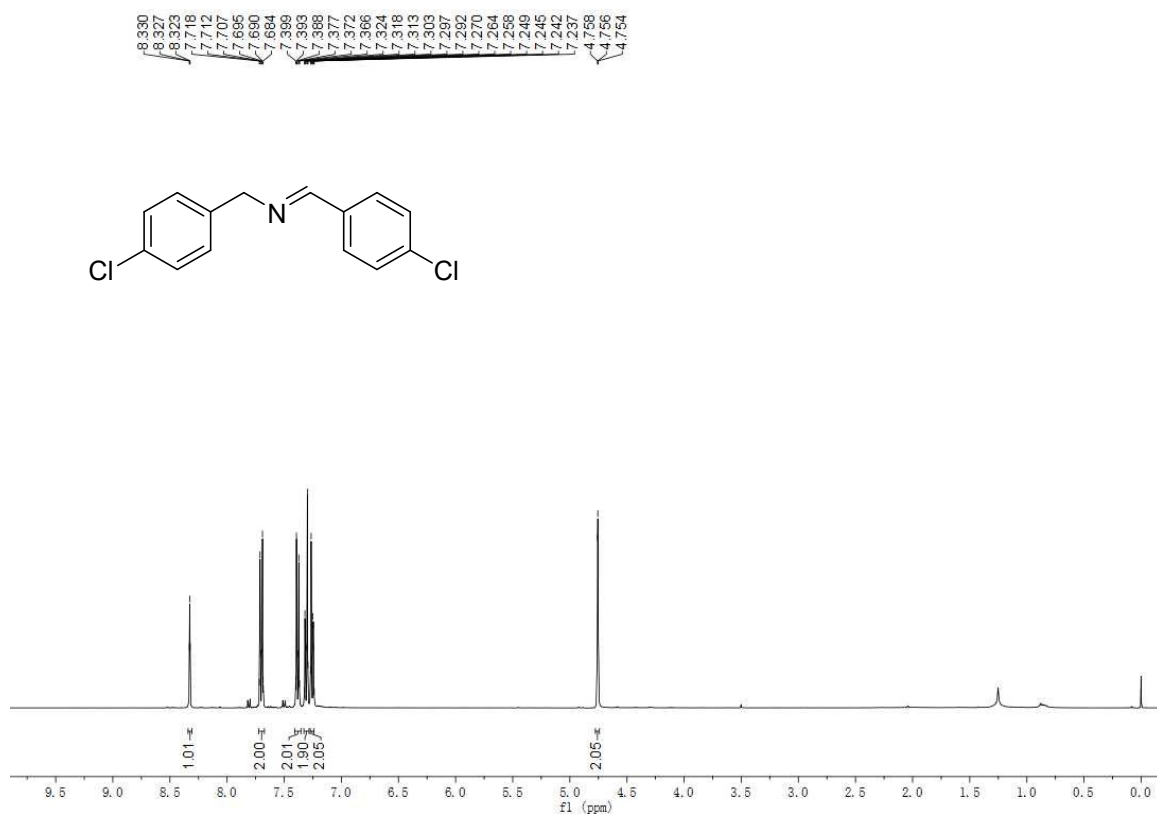

Figure S30.  $^{13}\text{C}\{^1\text{H}\}$  NMR spectra (100 MHz, Chloroform- $d$ ) of (*E*)-*N*-(4-chlorobenzyl)-1-(4-chlorophenyl)methanimine (2j):

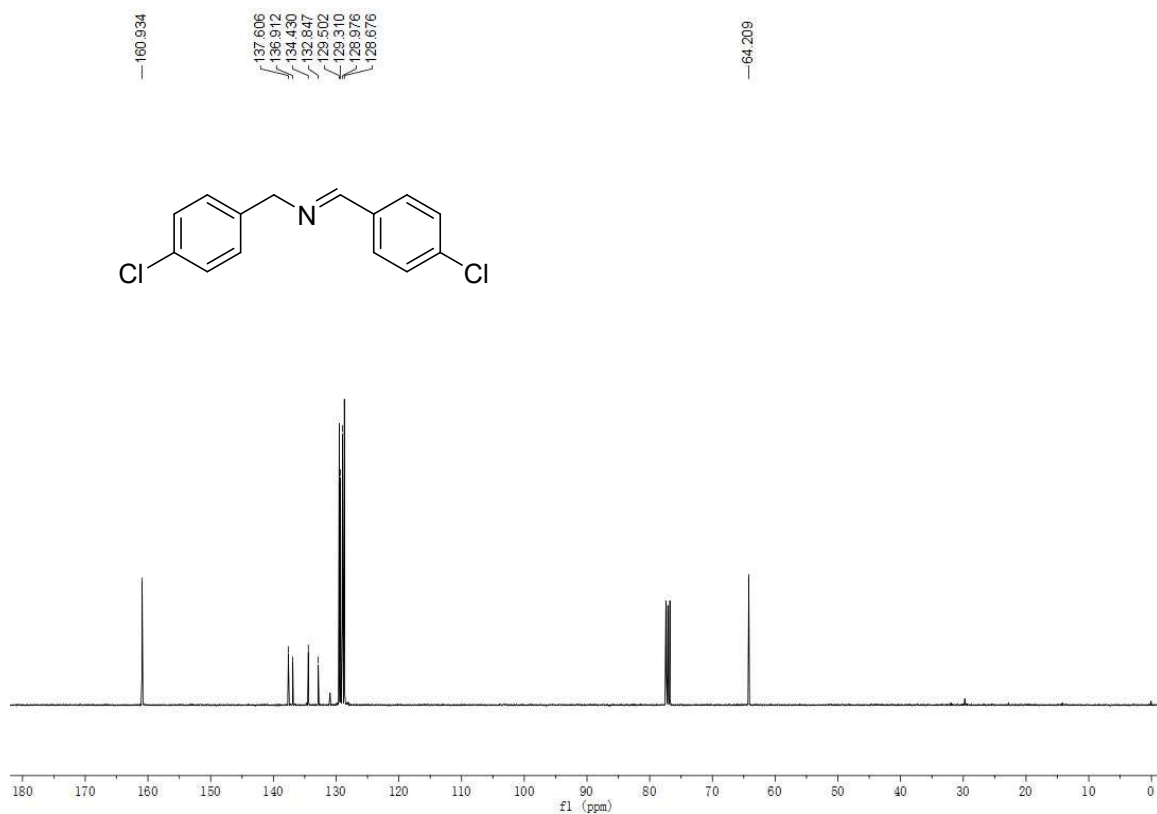

Figure S31.  $^1\text{H}$  NMR spectra (400 MHz, Chloroform-*d*) of (*E*)-1-(thiophen-2-yl)-*N*-(thiophen-2-ylmethyl)methanimine (2k):

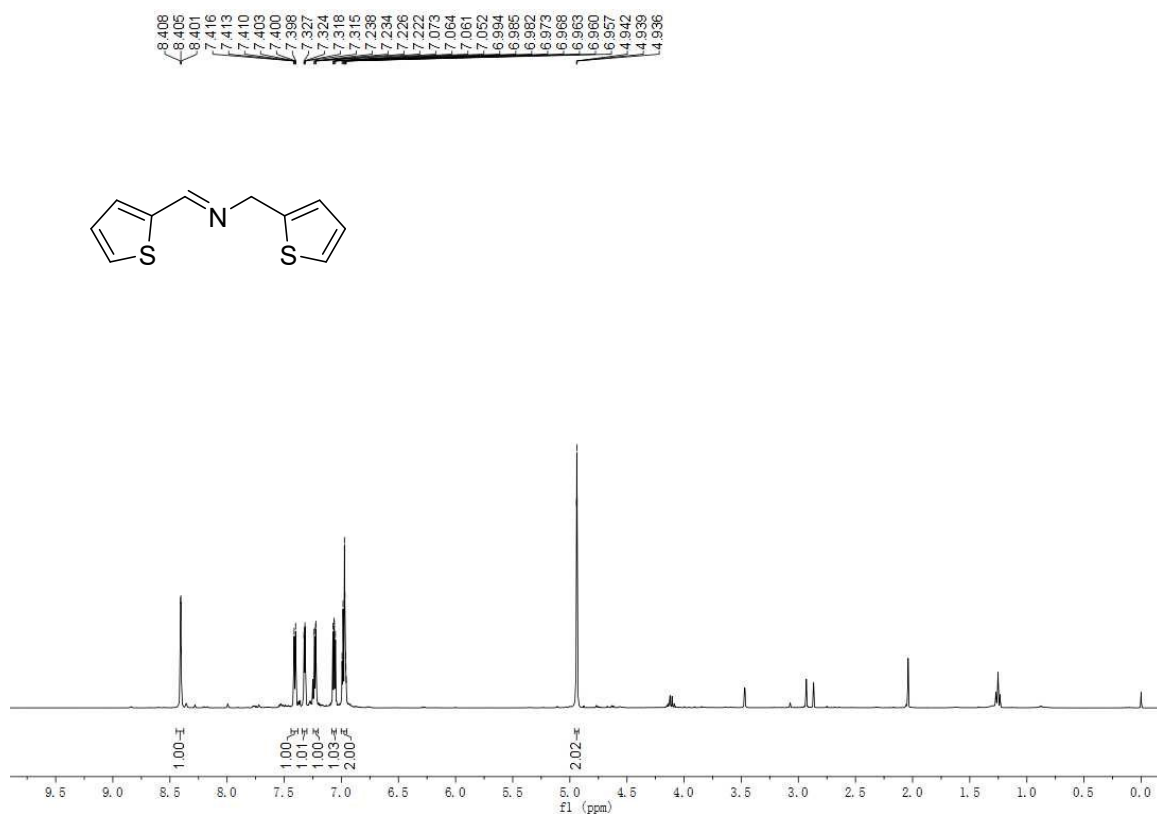

Figure S32.  $^{13}\text{C}\{^1\text{H}\}$  NMR spectra (100 MHz, Chloroform-*d*) of (*E*)-1-(thiophen-2-yl)-*N*-(thiophen-2-ylmethyl)methanimine (2k):

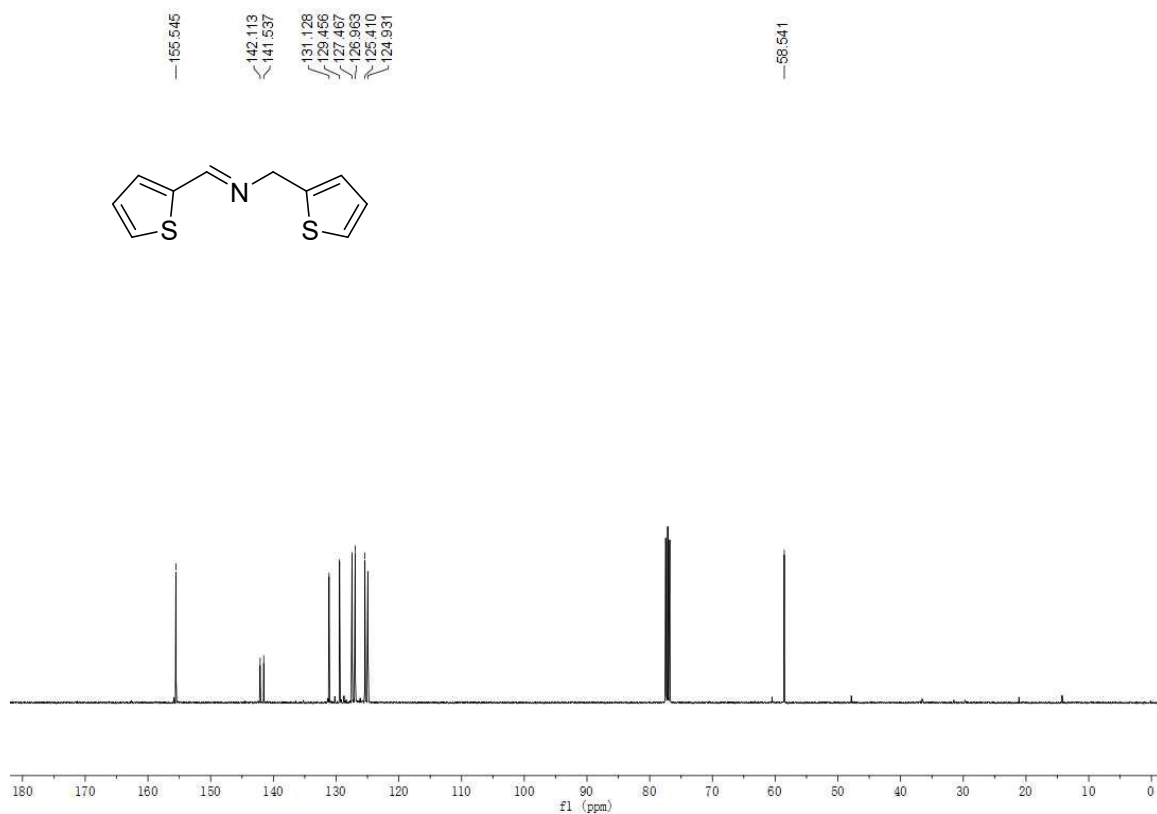

## References

- S1. C. Xu, H. Liu, D. Li, J.-H. Su and H.-L. Jiang, *Chem. Sci.*, 2018, 9, 3152–3158
- S2. D. Sun, L. Ye and Z. Li, *Appl. Catal., B*, 2015, 164, 428–432.
- S3. L. Zeng, T. Liu, C. He, D. Shi, F. Zhang and C. Duan, *J. Am. Chem. Soc.*, 2016, 138, 3958–3961.
- S4 F.-J. Zhao, G. Zhang, Z. Ju, Y.-X. Tan and D. Yuan, *Inorg. Chem.*, 2020, 59, 3297–3303.
- S5. P. Chen, Z. Guo, X. Liu, H. Lv, Y. Che, R. Bai, Y. Chi and H. Xing, *J. Mater. Chem. A*, 2019, 7, 27074–27080.
- S6. Y. Sha, J. Zhang, D. Tan, F. Zhang, X. Cheng, X. Tan, B. Zhang, B. Han, L. Zheng and J. Zhang, *Chem. Commun.*, 2020, 56, 10754–10757.
- S7. H. Liu, Z. Guo, H. Lv, X. Liu, Y. Che, Y. Mei, R. Bai, Y. Chi and H. Xing, *Inorg. Chem. Front.*, 2020, 7, 1016–1025.
- S8. J. Shi, J. Zhang, T. Liang, D. Tan, X. Tan, Q. Wan, X. Cheng, B. Zhang, B. Han, L. Liu and F. Zhang, *ACS Appl. Mater. Interfaces*, 2019, 11, 30953–30958.
- S9. L. M. Aguirre-Dí'az, N. Snejko, M. Iglesias, F. Sanchez, E. Gutierrez-Puebla and M. A. Monge, *Inorg. Chem.*, 2018, 57, 6883–6892.
- S10. H. Wei, Z. Guo, X. Liang, P. Chen, H. Liu and H. Xing, *ACS Appl. Mater. Interfaces*, 2019, 11, 3016–3023.
- S11. R. Liu, S. Meng, Y. Ma, L. Niu, S. He, X. Xu, B. Su, D. Lu, Z. Yang and Z. Lei, *Catal. Commun.*, 2019, 124, 108–112.
- S12. T. Wang, X. Tao, Y. Xiao, G. Qiu, Y. Yang and B. Li, *Catal. Sci. Technol.*, 2020, 10, 138–146.
- S13. X. Yang, T. Huang, S. Gao and R. Cao, *J. Catal.*, 2019, 378, 248–255.
- S14. S. Zhang, K. Chen, W. Peng and J. Huang, *New J. Chem.*, 2020, 44, 3052–3061.
- S15. R. Wu, S. Wang, Y. Zhou, J. Long, F. Dong and W. Zhang, *ACS Appl. Nano Mater.*, 2019, 2, 6818–6827.
